# Supplementary material
Source: PubMed Central journal article supplement (PMC5131922)

# Figure S1

## A Cohort overview

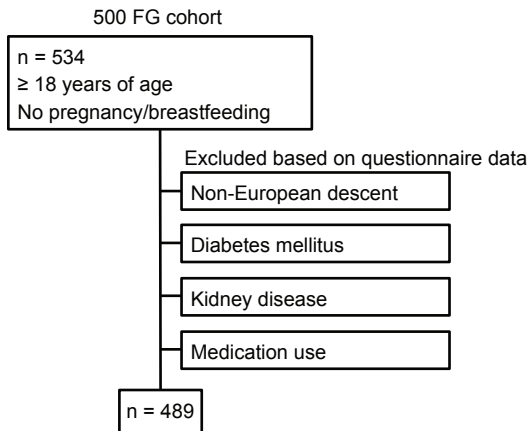

## B Total number of samples

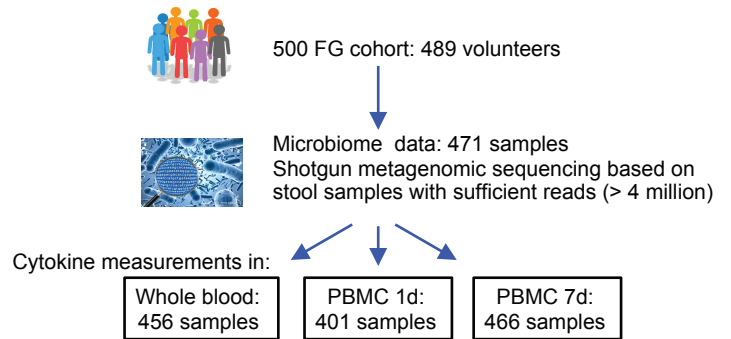

## C Overview of microbial stimulations

| Experiment  | Time | Stimulus                     | Concentration         | Strain/Manufacturer   |
|-------------|------|------------------------------|-----------------------|-----------------------|
| Whole blood | 48 h | RPMI (1640 Dutch Modified)   | -                     | Life Technologies     |
|             |      | LPS                          | 100 ng/ml             | <i>E. coli</i> /Sigma |
|             |      | <i>C. albicans</i> conidia   | 1x10 <sup>9</sup> /mL | UC820                 |
|             |      | <i>Staphylococcus aureus</i> | 1x10 <sup>6</sup> /mL | ATCC29213             |
| PBMC        | 24 h | LPS                          | 100 ng/ml             | <i>E. coli</i> /Sigma |
|             |      | RPMI + Serum                 | 10% human serum       | Life Technologies     |
|             |      | RPMI                         | -                     | Life Technologies     |
|             |      | <i>C. albicans</i> conidia   | 1x10 <sup>9</sup> /mL | UC820                 |
|             |      | <i>C. albicans</i> hyphae    | 1x10 <sup>6</sup> /mL | UC820                 |
|             |      | <i>Staphylococcus aureus</i> | 1x10 <sup>6</sup> /mL | ATCC29213             |
|             | 7 d  | <i>Bacteroides fragilis</i>  | 1x10 <sup>9</sup> /mL | ATCC25285             |
|             |      | RPMI + Serum                 | 10%                   | Life Technologies     |
|             |      | <i>C. albicans</i> conidia   | 1x10 <sup>9</sup> /mL | UC820                 |
|             |      | <i>C. albicans</i> hyphae    | 1x10 <sup>6</sup> /mL | UC820                 |
|             |      | <i>Staphylococcus aureus</i> | 1x10 <sup>6</sup> /mL | ATCC29213             |
|             |      | <i>Bacteroides fragilis</i>  | 1x10 <sup>9</sup> /mL | ATCC25285             |

## D Comparison of 500FG and LL-DEEP cohorts

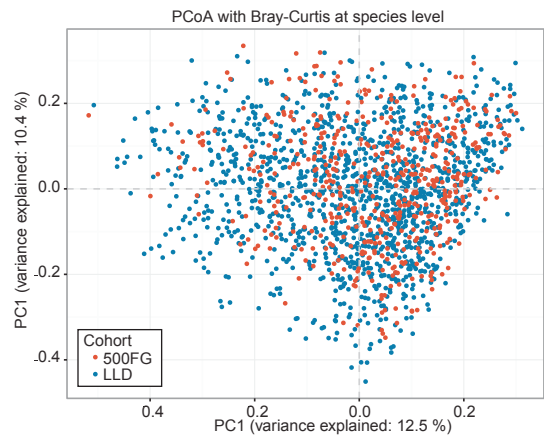

Supplement: NIHMS825283-supplement-1.pdf [file NIHMS825283-supplement-1.pdf]
