# Supplementary material
Source: PubMed Central journal article supplement (PMC5131922)

# Figure S2

**A Cytokine variation explained by microbial metabolic pathways**

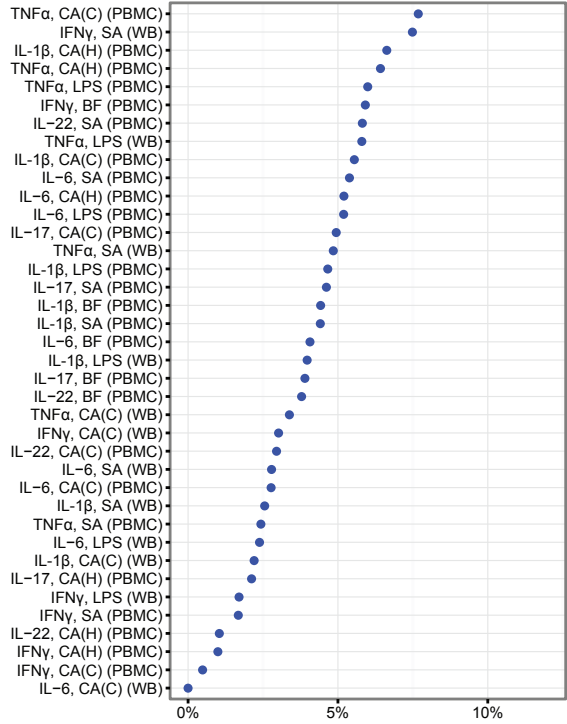

**B Cytokine variation explained by microbial GO categories**

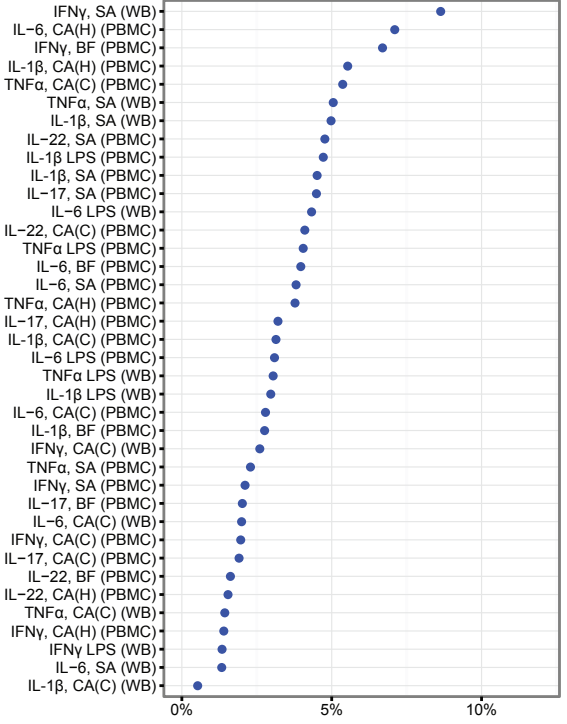

Supplement: NIHMS825283-supplement-2.pdf [file NIHMS825283-supplement-2.pdf]
