# Supplementary material
Source: PubMed Central journal article supplement (PMC5131922)

# Figure S4

## A Connection between palmitoleic and cis-vaccenate biosynthesis

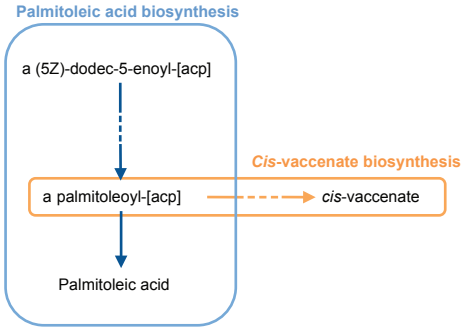

## B Palmitoleic acid has no effect on IL-17 and IL-22 production

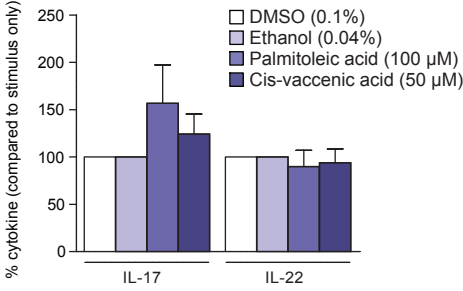

## C Palmitoleic acid inhibits IL-1β and IL-6 response

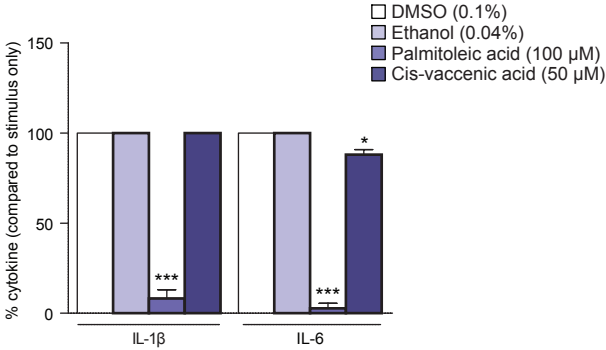

Supplement: NIHMS825283-supplement-4.pdf [file NIHMS825283-supplement-4.pdf]
