# Supplementary material
Source: PubMed Central journal article supplement (PMC5131922)
Supplement: NIHMS825283-supplement-5.pdf [file NIHMS825283-supplement-5.pdf]

Table S1. Related to Figure 3. Correlation coefficients for all significant species associations

|                                             | CA(C) | CA(H) |       |       |       | LPS   |       | BF   | SA   |       |       |       |       |
|---------------------------------------------|-------|-------|-------|-------|-------|-------|-------|------|------|-------|-------|-------|-------|
| Bifidobacterium adolescentis                | 0     | 0     | 0     | -0.15 | 0     | 0     | 0     | 0    | 0    | 0     | 0     | 0     | 0     |
| Bacteroides xylanisolvens                   | 0     | 0     | -0.16 | -0.15 | 0     | 0     | 0     | 0    | 0    | 0     | 0     | 0     | 0     |
| Streptococcus mitis/oralis/pneumoniae group | 0     | -0.15 | 0     | 0     | 0     | 0     | 0     | 0    | 0    | 0     | 0     | 0     | 0     |
| Parabacteroides distasonis                  | 0     | -0.15 | 0     | -0.15 | 0     | 0     | 0     | 0    | 0    | 0     | 0     | 0     | 0     |
| Ruminococcus champanellensis                | 0     | 0     | 0     | 0     | -0.13 | 0     | 0     | 0    | 0    | 0     | 0     | 0     | 0     |
| Methanobrevibacter smithii                  | 0     | 0     | 0     | 0     | -0.13 | 0     | 0     | 0    | 0    | 0     | 0     | 0     | 0     |
| Methanobrevibacter sp.                      | 0     | 0     | 0     | 0     | -0.12 | 0     | 0     | 0    | 0    | 0     | 0     | 0     | 0     |
| Bacteroides salyersiae                      | 0     | 0     | 0     | 0     | -0.12 | 0     | 0     | 0    | 0    | 0     | 0     | 0     | 0     |
| Dorea sp.                                   | 0     | 0     | 0     | 0     | -0.12 | 0     | 0     | 0    | 0    | 0     | 0     | 0     | 0     |
| Acidaminococcus intestini                   | 0     | 0     | 0     | 0     | 0     | 0.13  | 0     | 0    | 0    | 0     | 0     | 0     | 0     |
| Parabacteroides johnsonii                   | 0     | 0     | 0     | 0     | 0     | 0     | 0     | 0    | 0    | 0     | 0     | -0.14 | 0     |
| Bacteroides cellulosilyticus                | 0     | 0     | 0     | 0     | 0     | 0     | 0     | 0    | 0    | 0.15  | 0     | 0     | 0     |
| Methanosphaera stadtmanae                   | 0     | 0     | 0     | 0     | 0     | 0     | 0.14  | 0    | 0    | 0     | 0     | 0     | 0     |
| Lactobacillus acidophilus                   | 0     | 0     | 0     | 0     | 0     | 0     | 0.15  | 0    | 0    | 0     | 0     | 0     | 0     |
| Lachnospiraceae bacterium 3 1 57FAA CT1     | -0.15 | 0     | 0     | 0     | 0     | 0     | 0     | 0    | 0    | 0     | 0     | 0     | 0     |
| Ruminococcus gnavus                         | 0     | 0     | 0     | 0     | 0     | 0     | 0     | 0    | 0.16 | 0     | 0     | 0     | 0     |
| Streptococcus parasanguinis                 | 0     | 0     | 0     | 0     | 0.12  | 0     | 0     | 0    | 0    | 0     | 0     | 0     | 0     |
| Dorea longicatena                           | 0     | 0     | 0     | 0     | 0.12  | 0     | 0     | 0    | 0    | 0     | 0     | 0     | 0     |
| Dorea formicigenerans                       | 0     | 0     | 0     | 0     | 0.12  | 0     | 0     | 0    | 0    | 0     | 0     | 0     | 0     |
| Peptostreptococcus sp.                      | 0     | 0     | 0     | 0     | 0.12  | 0     | 0     | 0    | 0    | 0     | 0     | 0     | 0     |
| Streptococcus australis                     | 0     | 0     | 0     | 0     | 0.13  | 0     | 0     | 0    | 0    | 0     | 0     | 0     | 0     |
| Actinomyces turicensis                      | 0     | 0     | 0     | 0     | 0.13  | 0     | 0     | 0    | 0    | 0     | 0     | 0     | 0     |
| Bifidobacterium pseudocatenulatum           | 0     | 0     | 0     | 0     | 0.15  | 0     | 0     | 0    | 0    | 0     | 0     | 0     | 0     |
| Escherichia sp.                             | 0     | 0     | 0     | 0     | 0     | 0     | 0     | 0    | 0    | 0     | 0     | 0.13  | 0     |
| Bacteroides intestinalis                    | 0     | 0     | 0     | 0     | 0     | 0     | 0     | 0    | 0    | 0     | 0     | 0.13  | 0     |
| Anaerotruncus sp.                           | 0     | 0     | 0     | 0     | 0     | 0     | 0     | 0    | 0    | 0     | 0     | 0.14  | 0     |
| Megasphaera sp.                             | 0     | 0     | 0     | 0     | 0     | 0     | 0     | 0.15 | 0    | 0     | 0     | 0     | 0     |
| Eubacterium limosum                         | 0     | 0     | 0     | 0     | 0     | 0     | 0     | 0.15 | 0    | 0     | 0     | 0     | 0     |
| Bacteroides nordii                          | 0     | 0     | 0     | 0     | 0     | 0     | 0     | 0.15 | 0    | 0     | 0     | 0     | 0     |
| Lachnospiraceae bacterium 8 1 57FAA         | 0     | 0     | 0     | 0     | 0     | 0     | 0     | 0    | 0    | -0.15 | 0     | 0     | 0     |
| Bacteroides eggerthii                       | 0     | 0     | 0     | 0     | 0     | 0     | 0     | 0    | 0    | 0     | 0     | 0     | -0.16 |
| Lachnospiraceae bacterium 5 1 63FAA         | 0     | 0     | 0     | 0     | 0     | 0     | 0     | 0    | 0    | 0     | -0.17 | 0     | 0     |
| Clostridium leptum                          | 0     | 0     | 0     | 0     | 0     | -0.16 | 0     | 0    | 0    | 0     | 0     | 0     | 0     |
| Alistipes finegoldii                        | 0     | 0     | 0     | 0     | 0     | -0.16 | 0     | 0    | 0    | 0     | 0     | 0     | 0     |
| Bilophila sp.                               | 0     | 0     | 0     | 0     | 0     | -0.15 | 0     | 0    | 0    | 0     | 0     | 0     | 0     |
| Bilophila wadsworthia                       | 0     | 0     | 0     | 0     | 0     | -0.13 | 0     | 0    | 0    | 0     | 0     | 0     | 0     |
| Alistipes onderdonkii                       | 0     | 0     | 0     | 0     | 0     | -0.19 | 0     | 0    | 0    | 0     | 0     | 0     | 0     |
| Enterococcus faecium                        | 0     | 0     | 0     | 0     | 0     | 0     | -0.18 | 0    | 0    | 0     | 0     | 0     | 0     |
| Collinsella intestinalis                    | 0     | 0     | 0     | 0     | 0     | 0     | -0.14 | 0    | 0    | 0     | 0     | 0     | 0     |
| Odoribacter splanchnicus                    | 0     | 0     | 0     | -0.16 | 0     | -0.14 | -0.17 | 0    | 0    | 0     | 0     | 0     | 0     |
| Coprococcus comes                           | 0     | 0.18  | 0.17  | 0     | 0     | 0     | 0     | 0    | 0    | 0     | 0     | 0     | -0.15 |
| PBMC7d:IFN $\gamma$ -C.albicans conidia     |       |       |       |       |       |       |       |      |      |       |       |       |       |
| PBMC1d:IL-1 $\beta$ -C.albicans hyphae      |       |       |       |       |       |       |       |      |      |       |       |       |       |
| PBMC1d:IL-6-C.albicans hyphae               |       |       |       |       |       |       |       |      |      |       |       |       |       |
| PBMC1d:TNF $\alpha$ -C.albicans hyphae      |       |       |       |       |       |       |       |      |      |       |       |       |       |
| PBMC7d:IFN $\gamma$ -C.albicans hyphae      |       |       |       |       |       |       |       |      |      |       |       |       |       |
| WB:TNF $\alpha$ -LPS 100ng                  |       |       |       |       |       |       |       |      |      |       |       |       |       |
| PBMC1d:TNF $\alpha$ -LPS 100ng              |       |       |       |       |       |       |       |      |      |       |       |       |       |
| PBMC7d:IFN $\gamma$ -B.fragilis             |       |       |       |       |       |       |       |      |      |       |       |       |       |
| WB:IFN $\gamma$ -S.aureus                   |       |       |       |       |       |       |       |      |      |       |       |       |       |
| PBMC7d:IFN $\gamma$ -S.aureus               |       |       |       |       |       |       |       |      |      |       |       |       |       |
| WB:IL-6-S.aureus                            |       |       |       |       |       |       |       |      |      |       |       |       |       |
| PBMC7d:IL-17-S.aureus                       |       |       |       |       |       |       |       |      |      |       |       |       |       |
| PBMC7d:IL-22-S.aureus                       |       |       |       |       |       |       |       |      |      |       |       |       |       |

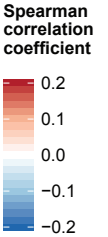

Table S2. Related to Figure 3. FDR values for all significant species associations

|                                             | CA(C) | CA(H) |      |      |      | LPS  |      | BF  | SA   |      |      |     |      |
|---------------------------------------------|-------|-------|------|------|------|------|------|-----|------|------|------|-----|------|
| Bifidobacterium adolescentis                | 0     | 0     | 0    | 0.19 | 0    | 0    | 0    | 0   | 0    | 0    | 0    | 0   | 0    |
| Bacteroides xylanisolvens                   | 0     | 0     | 0.2  | 0.19 | 0    | 0    | 0    | 0   | 0    | 0    | 0    | 0   | 0    |
| Streptococcus mitis/oralis/pneumoniae group | 0     | 0.2   | 0    | 0    | 0    | 0    | 0    | 0   | 0    | 0    | 0    | 0   | 0    |
| Parabacteroides distasonis                  | 0     | 0.2   | 0    | 0.19 | 0    | 0    | 0    | 0   | 0    | 0    | 0    | 0   | 0    |
| Ruminococcus champanellensis                | 0     | 0     | 0    | 0    | 0.16 | 0    | 0    | 0   | 0    | 0    | 0    | 0   | 0    |
| Methanobrevibacter smithii                  | 0     | 0     | 0    | 0    | 0.16 | 0    | 0    | 0   | 0    | 0    | 0    | 0   | 0    |
| Methanobrevibacter sp.                      | 0     | 0     | 0    | 0    | 0.16 | 0    | 0    | 0   | 0    | 0    | 0    | 0   | 0    |
| Bacteroides salyersiae                      | 0     | 0     | 0    | 0    | 0.16 | 0    | 0    | 0   | 0    | 0    | 0    | 0   | 0    |
| Dorea sp.                                   | 0     | 0     | 0    | 0    | 0.16 | 0    | 0    | 0   | 0    | 0    | 0    | 0   | 0    |
| Acidaminococcus intestini                   | 0     | 0     | 0    | 0    | 0    | 0.2  | 0    | 0   | 0    | 0    | 0    | 0   | 0    |
| Parabacteroides johnsonii                   | 0     | 0     | 0    | 0    | 0    | 0    | 0    | 0   | 0    | 0    | 0    | 0.2 | 0    |
| Bacteroides cellulosilyticus                | 0     | 0     | 0    | 0    | 0    | 0    | 0    | 0   | 0    | 0.15 | 0    | 0   | 0    |
| Methanosphaera stadtmanae                   | 0     | 0     | 0    | 0    | 0    | 0    | 0.2  | 0   | 0    | 0    | 0    | 0   | 0    |
| Lactobacillus acidophilus                   | 0     | 0     | 0    | 0    | 0    | 0    | 0.18 | 0   | 0    | 0    | 0    | 0   | 0    |
| Lachnospiraceae bacterium 3 1 57FAA CT1     | 0.19  | 0     | 0    | 0    | 0    | 0    | 0    | 0   | 0    | 0    | 0    | 0   | 0    |
| Ruminococcus gnavus                         | 0     | 0     | 0    | 0    | 0    | 0    | 0    | 0   | 0.18 | 0    | 0    | 0   | 0    |
| Streptococcus parasanguinis                 | 0     | 0     | 0    | 0    | 0.16 | 0    | 0    | 0   | 0    | 0    | 0    | 0   | 0    |
| Dorea longicatena                           | 0     | 0     | 0    | 0    | 0.16 | 0    | 0    | 0   | 0    | 0    | 0    | 0   | 0    |
| Dorea formicigenerans                       | 0     | 0     | 0    | 0    | 0.16 | 0    | 0    | 0   | 0    | 0    | 0    | 0   | 0    |
| Peptostreptococcus sp.                      | 0     | 0     | 0    | 0    | 0.16 | 0    | 0    | 0   | 0    | 0    | 0    | 0   | 0    |
| Streptococcus australis                     | 0     | 0     | 0    | 0    | 0.16 | 0    | 0    | 0   | 0    | 0    | 0    | 0   | 0    |
| Actinomyces turicensis                      | 0     | 0     | 0    | 0    | 0.16 | 0    | 0    | 0   | 0    | 0    | 0    | 0   | 0    |
| Bifidobacterium pseudocatenulatum           | 0     | 0     | 0    | 0    | 0.16 | 0    | 0    | 0   | 0    | 0    | 0    | 0   | 0    |
| Escherichia sp.                             | 0     | 0     | 0    | 0    | 0    | 0    | 0    | 0   | 0    | 0    | 0    | 0.2 | 0    |
| Bacteroides intestinalis                    | 0     | 0     | 0    | 0    | 0    | 0    | 0    | 0   | 0    | 0    | 0    | 0.2 | 0    |
| Anaerotruncus sp.                           | 0     | 0     | 0    | 0    | 0    | 0    | 0    | 0   | 0    | 0    | 0    | 0.2 | 0    |
| Megasphaera sp.                             | 0     | 0     | 0    | 0    | 0    | 0    | 0    | 0.1 | 0    | 0    | 0    | 0   | 0    |
| Eubacterium limosum                         | 0     | 0     | 0    | 0    | 0    | 0    | 0    | 0.1 | 0    | 0    | 0    | 0   | 0    |
| Bacteroides nordii                          | 0     | 0     | 0    | 0    | 0    | 0    | 0    | 0.1 | 0    | 0    | 0    | 0   | 0    |
| Lachnospiraceae bacterium 8 1 57FAA         | 0     | 0     | 0    | 0    | 0    | 0    | 0    | 0   | 0    | 0.15 | 0    | 0   | 0    |
| Bacteroides eggerthii                       | 0     | 0     | 0    | 0    | 0    | 0    | 0    | 0   | 0    | 0    | 0    | 0   | 0.16 |
| Lachnospiraceae bacterium 5 1 63FAA         | 0     | 0     | 0    | 0    | 0    | 0    | 0    | 0   | 0    | 0    | 0.05 | 0   | 0    |
| Clostridium leptum                          | 0     | 0     | 0    | 0    | 0    | 0.05 | 0    | 0   | 0    | 0    | 0    | 0   | 0    |
| Alistipes finegoldii                        | 0     | 0     | 0    | 0    | 0    | 0.05 | 0    | 0   | 0    | 0    | 0    | 0   | 0    |
| Bilophila sp.                               | 0     | 0     | 0    | 0    | 0    | 0.07 | 0    | 0   | 0    | 0    | 0    | 0   | 0    |
| Bilophila wadsworthia                       | 0     | 0     | 0    | 0    | 0    | 0.2  | 0    | 0   | 0    | 0    | 0    | 0   | 0    |
| Alistipes onderdonkii                       | 0     | 0     | 0    | 0    | 0    | 0.01 | 0    | 0   | 0    | 0    | 0    | 0   | 0    |
| Enterococcus faecium                        | 0     | 0     | 0    | 0    | 0    | 0    | 0.05 | 0   | 0    | 0    | 0    | 0   | 0    |
| Collinsella intestinalis                    | 0     | 0     | 0    | 0    | 0    | 0    | 0.2  | 0   | 0    | 0    | 0    | 0   | 0    |
| Odoribacter splanchnicus                    | 0     | 0     | 0    | 0.19 | 0    | 0.1  | 0.09 | 0   | 0    | 0    | 0    | 0   | 0    |
| Coprococcus comes                           | 0     | 0.08  | 0.14 | 0    | 0    | 0    | 0    | 0   | 0    | 0    | 0    | 0   | 0.16 |

Spearman correlation coefficient

0.2  
0.1  
0.0  
-0.1  
-0.2

PBMC7d:IFNγ-C.albicans conidia

PBMC1d:IL-1β-C.albicans hyphae

PBMC1d:IL-6-C.albicans hyphae

PBMC1d:TNFα-C.albicans hyphae

PBMC7d:IFNγ-C.albicans hyphae

WB:TNFα-LPS 100ng

PBMC1d:TNFα-LPS 100ng

PBMC7d:IFNγ-B.fragilis

WB:IFNγ-S.aureus

PBMC7d:IFNγ-S.aureus

WB:IL-6-S.aureus

PBMC7d:IL-17-S.aureus

PBMC7d:IL-22-S.aureus

Table S3. Related to Figure 3. Correlation coefficients for all significant genus associations

|                    | CA(C) |       | CA(H) | LPS   |       |       | BF    |       | SA    |
|--------------------|-------|-------|-------|-------|-------|-------|-------|-------|-------|
| Desulfovibrio      | 0     | -0.14 | 0     | 0     | 0     | 0     | 0     | 0     | 0     |
| Bilophila          | 0     | -0.16 | 0     | -0.15 | 0     | 0     | 0     | 0     | 0     |
| Odoribacter        | 0     | 0     | 0     | -0.13 | -0.14 | 0     | 0     | 0     | 0     |
| Megasphaera        | 0     | 0     | 0     | 0     | 0     | 0     | 0     | 0.14  | 0     |
| Dorea              | 0     | 0     | 0.14  | 0     | 0     | 0     | 0     | 0     | 0     |
| Clostridiales spp. | 0.16  | 0     | 0     | 0     | 0     | 0     | 0     | 0     | 0     |
| Escherichia        | 0     | 0     | 0     | 0     | 0     | 0     | 0     | 0     | 0.15  |
| Anaerotruncus      | 0     | 0     | 0     | 0     | 0     | 0     | 0     | 0     | 0.16  |
| Coprobacillus      | 0     | 0     | 0     | 0     | 0     | 0     | 0     | 0     | 0.12  |
| Clostridium        | 0     | 0     | 0     | 0     | 0     | 0     | 0     | 0     | 0.13  |
| Anaerostipes       | 0     | 0     | 0     | 0     | 0     | 0     | 0     | 0     | 0.12  |
| Faecalibacterium   | 0     | 0     | 0     | 0     | 0     | 0     | 0     | 0     | -0.12 |
| Atopobium          | 0     | 0     | 0     | 0     | 0     | 0     | 0     | 0     | -0.11 |
| Methanobrevibacter | 0     | 0     | -0.13 | 0     | 0     | 0     | 0     | 0     | 0     |
| Catenibacterium    | 0     | 0.14  | 0     | 0     | 0     | 0     | 0     | 0     | 0     |
| Methanosphaera     | 0     | 0     | 0     | 0     | 0.14  | 0     | 0     | 0     | 0     |
| Roseburia          | 0     | 0     | 0     | 0     | 0     | 0     | -0.16 | 0     | 0     |
| Oscillibacter      | 0     | 0     | 0     | 0     | 0     | -0.14 | 0     | 0     | 0     |
| Barnesiella        | 0     | 0     | 0     | 0     | 0     | -0.13 | 0     | -0.13 | 0     |
| Leuconostoc        | 0     | 0     | 0     | 0     | 0     | 0     | 0     | -0.15 | 0     |

Spearman correlation coefficient

0.2  
0.1  
0.0  
-0.1  
-0.2

WB:TNFα-C.albicans conidia

PBMC1d:TNFα-C.albicans conidia

PBMC7d:IFNγ-C.albicans hyphae

WB:TNFα-LPS 100ng

PBMC1d:TNFα-LPS 100ng

WB:IFNγ-LPS 100ng

PBMC1d:IL-6-B.fragilis

PBMC7d:IFNγ-B.fragilis

PBMC7d:IL-17-S.aureus

Table S4. Related to Figure 3. FDR values for all significant genus associations

|                    | CA(C) |      | CA(H) | LPS  |      |      | BF   |      | SA   |
|--------------------|-------|------|-------|------|------|------|------|------|------|
| Desulfovibrio      | 0     | 0.18 | 0     | 0    | 0    | 0    | 0    | 0    | 0    |
| Bilophila          | 0     | 0.08 | 0     | 0.12 | 0    | 0    | 0    | 0    | 0    |
| Odoribacter        | 0     | 0    | 0     | 0.19 | 0.19 | 0    | 0    | 0    | 0    |
| Megasphaera        | 0     | 0    | 0     | 0    | 0    | 0    | 0    | 0.11 | 0    |
| Dorea              | 0     | 0    | 0.19  | 0    | 0    | 0    | 0    | 0    | 0    |
| Clostridiales spp. | 0.07  | 0    | 0     | 0    | 0    | 0    | 0    | 0    | 0    |
| Escherichia        | 0     | 0    | 0     | 0    | 0    | 0    | 0    | 0    | 0.06 |
| Anaerotruncus      | 0     | 0    | 0     | 0    | 0    | 0    | 0    | 0    | 0.04 |
| Coprobacillus      | 0     | 0    | 0     | 0    | 0    | 0    | 0    | 0    | 0.14 |
| Clostridium        | 0     | 0    | 0     | 0    | 0    | 0    | 0    | 0    | 0.14 |
| Anaerostipes       | 0     | 0    | 0     | 0    | 0    | 0    | 0    | 0    | 0.14 |
| Faecalibacterium   | 0     | 0    | 0     | 0    | 0    | 0    | 0    | 0    | 0.14 |
| Atopobium          | 0     | 0    | 0     | 0    | 0    | 0    | 0    | 0    | 0.18 |
| Methanobrevibacter | 0     | 0    | 0.19  | 0    | 0    | 0    | 0    | 0    | 0    |
| Catenibacterium    | 0     | 0.18 | 0     | 0    | 0    | 0    | 0    | 0    | 0    |
| Methanosphaera     | 0     | 0    | 0     | 0    | 0.19 | 0    | 0    | 0    | 0    |
| Roseburia          | 0     | 0    | 0     | 0    | 0    | 0    | 0.09 | 0    | 0    |
| Oscillibacter      | 0     | 0    | 0     | 0    | 0    | 0.16 | 0    | 0    | 0    |
| Barnesiella        | 0     | 0    | 0     | 0    | 0    | 0.16 | 0    | 0.15 | 0    |
| Leuconostoc        | 0     | 0    | 0     | 0    | 0    | 0    | 0    | 0.09 | 0    |

**Spearman correlation coefficient**

0.2  
0.1  
0.0  
-0.1  
-0.2

WB:TNFα-C.albicans conidia

PBMC1d:TNFα-C.albicans conidia

PBMC7d:IFNγ-C.albicans hyphae

WB:TNFα-LPS 100ng

PBMC1d:TNFα-LPS 100ng

WB:IFNγ-LPS 100ng

PBMC1d:IL-6-B.fragilis

PBMC7d:IFNγ-B.fragilis

PBMC7d:IL-17-S.aureus

Table S5. Related to Figure 4. Correlation coefficients for all significant pathway associations

|                                                                                         |                                                                     | CA(C) | CA(H) | LPS   | BF    | SA    |
|-----------------------------------------------------------------------------------------|---------------------------------------------------------------------|-------|-------|-------|-------|-------|
|                                                                                         | PWY66 399 gluconeogenesis III                                       | -0.14 | 0     | 0     | 0     | 0     |
| PWY30 1109 superpathway of 4 hydroxybenzoate biosynthesis yeast                         |                                                                     | 0     | 0     | 0     | 0     | 0     |
|                                                                                         | PWY 6936 seleno amino acid biosynthesis                             | 0     | 0     | 0     | 0     | 0     |
|                                                                                         | PWY 6151 S adenosyl L methionine cycle I                            | 0     | 0     | 0     | 0     | 0.13  |
|                                                                                         | PYRIDNUCALS PWY NAD salvage pathway I                               | 0     | 0     | 0     | 0     | 0.13  |
| PWY0 1586 peptidoglycan maturation meso diaminopimelate containing                      |                                                                     | 0     | 0.1   | 0     | 0     | 0     |
| PWY 7539 6 hydroxymethyl dihydropterin diphosphate biosynthesis III Chlamydia           |                                                                     | 0     | 0.12  | 0.17  | 0     | 0.14  |
|                                                                                         | COA PWY coenzyme A biosynthesis I                                   | 0     | 0.2   | 0     | 0.17  | 0     |
|                                                                                         | COA PWY 1 coenzyme A biosynthesis II mammalian                      | 0     | 0.16  | 0     | 0.16  | 0     |
|                                                                                         | PYRIDNUCYSN PWY NAD biosynthesis I from aspartate                   | 0     | 0.13  | 0     | 0     | 0     |
| PWY 5347 superpathway of L methionine biosynthesis transsulfuration                     |                                                                     | 0     | 0.13  | 0     | 0     | 0     |
|                                                                                         | LACTOSCAT PWY lactose and galactose degradation I                   | 0     | 0.13  | 0     | 0     | 0     |
|                                                                                         | PWY 2942 L lysine biosynthesis III                                  | 0     | 0.14  | 0     | 0     | 0     |
|                                                                                         | HSERMETANA PWY L methionine biosynthesis III                        | 0     | 0.14  | 0     | 0     | 0     |
|                                                                                         | METSYN PWY L homoserine and L methionine biosynthesis               | 0     | 0.13  | 0     | 0     | 0     |
|                                                                                         | THRESYN PWY superpathway of L threonine biosynthesis                | 0     | 0.12  | 0     | 0     | 0     |
|                                                                                         | PWY 6606 guanosine nucleotides degradation III                      | 0     | 0.12  | 0     | 0     | 0     |
| PWY 7357 thiamin formation from pyrimithiane and oxylthiamine yeast                     |                                                                     | 0     | 0.12  | 0     | 0     | 0     |
| PWY 724 superpathway of L lysine L threonine and L methionine biosynthesis II           |                                                                     | 0     | 0.15  | 0     | 0     | 0     |
|                                                                                         | PWY 6124 inosine 5 phosphate biosynthesis II                        | 0     | 0.15  | 0     | 0     | 0     |
|                                                                                         | PWY 6353 purine nucleotides degradation II aerobic                  | 0     | 0.14  | 0     | 0     | 0     |
|                                                                                         | PWY 5097 L lysine biosynthesis VI                                   | 0     | 0.14  | 0     | 0     | 0     |
|                                                                                         | PWY0 1296 purine ribonucleosides degradation                        | 0     | 0.11  | 0     | 0     | 0     |
| MET SAM PWY superpathway of S adenosyl L methionine biosynthesis                        |                                                                     | 0     | 0.11  | 0     | 0     | 0     |
|                                                                                         | CODH PWY reductive acetyl coenzyme A pathway                        | 0     | 0.1   | 0     | 0     | 0     |
|                                                                                         | PWY66 422 D galactose degradation V Leloir pathway                  | 0     | 0.1   | 0     | 0     | 0     |
|                                                                                         | PWY 6317 galactose degradation I Leloir pathway                     | 0     | 0.1   | 0     | 0     | 0     |
|                                                                                         | PWY 6628 superpathway of L phenylalanine biosynthesis               | 0     | 0.1   | 0     | 0     | 0     |
| PWY0 1297 superpathway of purine deoxyribonucleosides degradation                       |                                                                     | 0     | 0.1   | 0     | 0     | 0     |
|                                                                                         | PWY 621 sucrose degradation II sucrose invertase                    | 0.14  | 0.14  | 0     | 0     | 0     |
|                                                                                         | PWY 5989 stearate biosynthesis II bacteria and plants               | 0.14  | 0.14  | 0     | -0.16 | 0     |
|                                                                                         | PWY 5973 cis vaccenate biosynthesis                                 | 0.14  | 0.15  | 0     | -0.15 | 0     |
|                                                                                         | PWY 5367 petroselinic acid biosynthesis                             | 0.15  | 0.15  | 0     | -0.14 | 0     |
|                                                                                         | PWY 6113 superpathway of mycolate biosynthesis                      | 0     | 0.12  | 0     | -0.17 | 0     |
| PWY 5695 urate biosynthesis inosine 5 phosphate degradation                             |                                                                     | 0     | 0.12  | 0     | -0.16 | 0     |
|                                                                                         | PWY 7199 pyrimidine deoxyribonucleosides salvage                    | 0     | 0.1   | 0     | -0.18 | 0     |
|                                                                                         | RIBOSYN2 PWY flavin biosynthesis mitochondria plants                | 0     | 0.13  | 0     | -0.2  | 0     |
| PWY 6282 palmitoleic acid biosynthesis I from 52 dodec 5 enoate                         |                                                                     | 0     | 0.15  | 0     | -0.16 | 0     |
|                                                                                         | PWY 7663 gonadate biosynthesis anaerobic                            | 0     | 0     | 0     | -0.15 | 0     |
| PWY 6318 L phenylalanine degradation IV mammalian via side chain                        |                                                                     | 0     | 0     | 0     | -0.15 | 0     |
|                                                                                         | PWY63 321 mycolate biosynthesis                                     | 0     | 0     | 0     | -0.15 | 0     |
|                                                                                         | PWY 7000 kanamycin biosynthesis                                     | 0     | 0     | 0     | -0.14 | 0     |
|                                                                                         | PWY 5971 palmitate biosynthesis II bacteria and plants              | 0     | 0     | 0     | -0.15 | 0     |
|                                                                                         | FASYN ELONG PWY fatty acid elongation saturated                     | 0     | 0     | 0     | -0.15 | 0     |
|                                                                                         | PWY 6398 diplopterol and cycloaristol biosynthesis                  | 0     | 0     | 0     | -0.17 | 0     |
| PWY 7282 4 amino 2 methyl 5 phosphomethylpyrimidine biosynthesis yeast                  |                                                                     | -0.17 | -0.12 | -0.19 | 0     | 0     |
| PWY 5306 superpathway of thiosulfate metabolism Desulfovibrio sulfodismutans            |                                                                     | -0.15 | -0.14 | 0     | 0     | 0     |
|                                                                                         | PWY 2221 Entner Doudoroff pathway III semi phosphorylative          | -0.15 | -0.2  | 0     | 0     | 0     |
|                                                                                         | PYRIDOXSYN PWY pyridoxal 5 phosphate biosynthesis I                 | -0.15 | -0.21 | 0     | 0     | 0     |
| PWY0 845 superpathway of pyridoxal 5 phosphate biosynthesis and salvage                 |                                                                     | -0.14 | -0.21 | 0     | 0     | 0     |
| PWY 7388 octanoyl acyl carrier protein biosynthesis mitochondria yeast                  |                                                                     | -0.17 | -0.21 | 0     | 0     | -0.14 |
| PWY 5994 palmitate biosynthesis I animals and fungi                                     |                                                                     | -0.17 | -0.21 | 0     | 0     | -0.14 |
|                                                                                         | PWY0 1261 anhydromuropeptides recycling                             | -0.15 | -0.2  | 0     | -0.19 | 0     |
|                                                                                         | PWY 5081 L tryptophan degradation VIII to tryptophol                | -0.15 | 0     | 0     | -0.15 | -0.2  |
|                                                                                         | PWY 5873 ubiquinol 7 biosynthesis eukaryotic                        | 0     | -0.16 | 0     | 0     | 0     |
|                                                                                         | PWY 5871 ubiquinol 9 biosynthesis eukaryotic                        | 0     | -0.16 | 0     | 0     | 0     |
|                                                                                         | PWY 5872 ubiquinol 10 biosynthesis eukaryotic                       | 0     | -0.16 | 0     | 0     | 0     |
|                                                                                         | P108 PWY pyruvate fermentation to propanoate I                      | 0     | -0.16 | 0     | 0     | 0     |
|                                                                                         | PWY 6215 4 chlorobenzoate degradation                               | 0     | -0.15 | 0     | 0     | 0     |
| P162 PWY L glutamate degradation V via hydroxyglutarate                                 |                                                                     | 0     | -0.15 | 0     | 0     | 0     |
|                                                                                         | PWY 5392 reductive TCA cycle II                                     | 0     | -0.15 | 0     | 0     | 0     |
| PWY 6383 mono trans poly cis decaprenyl phosphate biosynthesis                          |                                                                     | 0     | -0.16 | 0     | 0     | 0     |
|                                                                                         | PWY 5532 adenosine nucleotides degradation IV                       | 0     | -0.16 | 0     | 0     | 0     |
|                                                                                         | P42 PWY incomplete reductive TCA cycle                              | 0     | -0.16 | 0     | 0     | 0     |
| THREOCAT PWY superpathway of L threonine metabolism                                     |                                                                     | 0     | -0.16 | 0     | 0     | 0     |
|                                                                                         | PWY 5870 ubiquinol 8 biosynthesis eukaryotic                        | 0     | -0.16 | 0     | 0     | 0     |
|                                                                                         | P23 PWY reductive TCA cycle I                                       | 0     | -0.16 | 0     | 0     | 0     |
| X4 HYDROXYMANDELATE DEGRADATION PWY 4 hydroxymandelate degradation                      |                                                                     | 0     | -0.17 | 0     | 0     | 0     |
|                                                                                         | CITRULBIO PWY L citrulline biosynthesis                             | 0     | -0.17 | 0     | 0     | 0     |
| PWY 6145 superpathway of salic acids and CMP salic acids biosynthesis                   |                                                                     | 0     | -0.17 | 0     | 0     | 0     |
|                                                                                         | PWY 6641 superpathway of sulfolactate degradation                   | 0     | -0.17 | 0     | 0     | 0     |
| PWY30 19 ubiquinol 6 biosynthesis from 4 hydroxybenzoate eukaryotic                     |                                                                     | 0     | -0.17 | 0     | 0     | 0     |
|                                                                                         | ARGININE SYN4 PWY L ornithine de novo biosynthesis                  | 0     | -0.17 | 0     | 0     | 0     |
| PWY 6138 CMP N acetylnearuminate biosynthesis I eukaryotes                              |                                                                     | 0     | -0.18 | 0     | 0     | 0     |
| PWY 4981 L proline biosynthesis II from arginine                                        |                                                                     | 0     | -0.19 | 0     | 0     | 0     |
| REDCITCYC TCA cycle VIII helicobacter                                                   |                                                                     | 0     | -0.15 | 0     | 0     | 0     |
|                                                                                         | P161 PWY acetylene degradation                                      | 0     | -0.14 | 0     | 0     | 0     |
| PWY30 355 stearate biosynthesis III fungi                                               |                                                                     | 0     | -0.15 | 0     | 0     | 0     |
| 3 HYDROXYPHENYLACETATE DEGRADATION PWY 4 hydroxyphenylacetate degradation               |                                                                     | 0     | -0.14 | 0     | 0     | 0     |
|                                                                                         | PWY 6708 ubiquinol 8 biosynthesis prokaryotic                       | 0     | -0.14 | 0     | 0     | 0     |
| POLYAMINSYN3 PWY superpathway of polyamine biosynthesis II                              |                                                                     | 0     | -0.14 | 0     | 0     | 0     |
|                                                                                         | VALDEG PWY L valine degradation I                                   | 0     | -0.15 | 0     | 0     | 0     |
| UBISYN PWY superpathway of ubiquinol 8 biosynthesis prokaryotic                         |                                                                     | 0     | -0.15 | 0     | 0     | 0     |
| PWY 7200 superpathway of pyrimidine deoxyribonucleoside salvage                         |                                                                     | 0     | -0.15 | 0     | 0     | 0     |
|                                                                                         | PWY 4984 urea cycle                                                 | 0     | -0.15 | 0     | 0     | 0     |
|                                                                                         | PWY 7197 pyrimidine deoxyribonucleotide phosphorylation             | 0     | -0.15 | 0     | 0     | 0     |
|                                                                                         | PWY 5484 glycolysis II from fructose 6 phosphate                    | 0     | -0.14 | 0     | 0     | 0     |
| PWY 5173 superpathway of acetyl CoA biosynthesis                                        |                                                                     | 0     | -0.14 | 0     | 0     | 0     |
|                                                                                         | PWY6666 2 dopamine degradation                                      | 0     | -0.14 | 0     | 0     | 0     |
| PWY 6969 TCA cycle V 2 oxoglutarate ferredoxin oxidoreductase                           |                                                                     | 0     | -0.14 | 0     | 0     | 0     |
| PWY 6769 rhannogalacturonan type I degradation I fungi                                  |                                                                     | 0     | -0.14 | 0     | 0     | 0     |
|                                                                                         | PWY 6143 CMP pseudaminic acid biosynthesis                          | 0     | -0.14 | 0     | 0     | 0     |
| P163 PWY L lysine fermentation to acetate and butanoate                                 |                                                                     | 0     | -0.13 | 0     | 0     | 0     |
|                                                                                         | PWY66 398 TCA cycle III animals                                     | 0     | -0.14 | 0     | 0     | 0     |
| PWY 7654 8E 10E dodeca 8 10 dienol biosynthesis                                         |                                                                     | 0     | -0.14 | 0     | 0     | 0     |
|                                                                                         | PWY 3661 glycine betaine degradation I                              | 0     | -0.12 | 0     | 0     | 0     |
|                                                                                         | P562 PWY myo inositol degradation I                                 | 0     | -0.12 | 0     | 0     | 0     |
|                                                                                         | PWY 6703 preC0 biosynthesis                                         | 0     | -0.12 | 0     | 0     | 0     |
|                                                                                         | HISDEG PWY L histidine degradation I                                | 0     | -0.12 | 0     | 0     | 0     |
| PWY 7385 1 3 propanediol biosynthesis engineered                                        |                                                                     | 0     | -0.12 | 0     | 0     | 0     |
|                                                                                         | PWY 5055 nicotinate degradation III                                 | 0     | -0.12 | 0     | 0     | 0     |
| PWY 6147 6 hydroxymethyl dihydropterin diphosphate biosynthesis I                       |                                                                     | 0     | -0.11 | 0     | 0     | 0     |
| PWY 1861 formaldehyde assimilation II RuMP Cycle                                        |                                                                     | 0     | -0.11 | 0     | 0     | 0     |
| FOLSYN PWY superpathway of tetrahydrofolate biosynthesis and salvage                    |                                                                     | 0     | -0.11 | 0     | 0     | 0     |
| PWY 6612 superpathway of tetrahydrofolate biosynthesis                                  |                                                                     | 0     | -0.11 | 0     | 0     | 0     |
|                                                                                         | PWY 2201 folate transformations I                                   | 0     | -0.11 | 0     | 0     | 0     |
|                                                                                         | PWY0 42 2 methylcitrate cycle I                                     | 0     | -0.11 | 0     | 0     | 0     |
| PWY 821 superpathway of sulfur amino acid biosynthesis Saccharomyces cerevisiae         |                                                                     | 0     | -0.11 | 0     | 0     | 0     |
|                                                                                         | P3 PWY gallate degradation III anaerobic                            | 0     | -0.11 | 0     | 0     | 0     |
|                                                                                         | PWY 7024 superpathway of the 3 hydroxypropanoate cycle              | 0     | -0.13 | 0     | 0     | 0     |
|                                                                                         | PWY 5744 glyoxylate assimilation                                    | 0     | -0.13 | 0     | 0     | 0     |
| PWY 5724 superpathway of atrazine degradation                                           |                                                                     | 0     | -0.13 | 0     | 0     | 0     |
| PWY 6863 pyruvate fermentation to hexanol                                               |                                                                     | 0     | -0.13 | 0     | 0     | 0     |
|                                                                                         | TCA TCA cycle I prokaryotic                                         | 0     | -0.13 | 0     | 0     | 0     |
|                                                                                         | P241 PWY coenzyme B biosynthesis                                    | 0     | -0.13 | 0     | 0     | 0     |
| PWY 7196 superpathway of pyrimidine ribonucleosides salvage                             |                                                                     | 0     | -0.13 | 0     | 0     | 0     |
|                                                                                         | P261 PWY coenzyme M biosynthesis I                                  | 0     | -0.13 | 0     | 0     | 0     |
| Y 5464 superpathway of cytosolic glycolysis plants pyruvate dehydrogenase and TCA cycle |                                                                     | 0     | -0.13 | 0     | 0     | 0     |
|                                                                                         | PWY 5181 toluene degradation III aerobic via p cresol               | 0     | -0.13 | 0     | 0     | 0     |
|                                                                                         | ANAGLYCOLYSIS PWY glycolysis III from glucose                       | 0     | -0.12 | 0     | 0     | 0     |
| PWY 5138 unsaturated even numbered fatty acid beta oxidation                            |                                                                     | 0     | -0.13 | 0     | 0     | 0     |
| ANAEROFRUCAT PWY homolactic fermentation                                                |                                                                     | 0     | -0.13 | 0     | 0     | 0     |
|                                                                                         | PWY 5030 L histidine degradation III                                | 0     | -0.13 | 0     | 0     | 0     |
|                                                                                         | PWY 6834 spermidine biosynthesis III                                | 0     | -0.1  | 0     | 0     | 0     |
| DENITRIFICATION PWY nitrate reduction I denitrification                                 |                                                                     | 0     | -0.1  | 0     | 0     | 0     |
| PWY 7208 superpathway of pyrimidine nucleobases salvage                                 |                                                                     | 0     | -0.1  | 0     | 0     | 0     |
| PWY 6471 peptidoglycan biosynthesis IV Enterococcus faecium                             |                                                                     | 0     | -0.1  | 0     | 0     | 0     |
|                                                                                         | PWY 6305 putrescine biosynthesis IV                                 | 0     | -0.1  | 0     | 0     | 0     |
| PWY 5179 toluene degradation V aerobic via toluene cis diol                             |                                                                     | 0     | -0.1  | 0     | 0     | 0     |
| PWY 7184 pyrimidine deoxyribonucleotides de novo biosynthesis I                         |                                                                     | 0     | -0.1  | 0     | 0     | 0     |
| P184 PWY protocatechuate degradation I meta cleavage pathway                            |                                                                     | 0     | -0.1  | 0     | 0     | 0     |
| PWY 7211 superpathway of pyrimidine deoxyribonucleotides de novo biosynthesis           |                                                                     | 0     | -0.1  | 0     | 0     | 0     |
| CHUATE ORTHO CLEAVAGE PWY protocatechuate degradation II ortho cleavage pathway         |                                                                     | 0     | -0.1  | 0     | 0     | 0     |
| PWY 7389 superpathway of anaerobic energy metabolism invertebrates                      |                                                                     | 0     | -0.1  | 0     | 0     | 0     |
|                                                                                         | PWY 561 superpathway of glyoxylate cycle and fatty acid degradation | 0     | -0.1  | 0     | 0     | 0     |
| LPSSYN PWY superpathway of lipopolysaccharide biosynthesis                              |                                                                     | 0     | -0.1  | 0     | 0     | 0     |
| PWY 7210 pyrimidine deoxyribonucleotides biosynthesis from CTP                          |                                                                     | 0     | -0.1  | 0     | 0     | 0     |
| CENTFERM PWY pyruvate fermentation to butanoate                                         |                                                                     | 0     | -0.1  | 0     | 0     | 0     |
| PWY 6590 superpathway of Clostridium acetobutylicum acidogenic fermentation             |                                                                     | 0     | -0.1  | 0     | 0     | 0     |
| PWY 7218 photosynthetic 3 hydroxybutanoate biosynthesis engineered                      |                                                                     | 0     | -0.1  | 0     | 0     | 0     |
|                                                                                         | PHOTOALL PWY oxygenic photosynthesis                                | 0     | -0.1  | 0     | 0     | 0     |
|                                                                                         | PWY 6886 1 butanol autotrophic biosynthesis                         | 0     | -0.1  | 0     | 0     | 0     |
| METHYLGALLATE DEGRADATION PWY methylgallate degradation                                 |                                                                     | 0     | -0.1  | 0     | 0     | 0     |
| GALLATE DEGRADATION I PWY gallate degradation II                                        |                                                                     | 0     | -0.1  | 0     | 0     | 0     |
| PWY66 409 superpathway of purine nucleotide salvage                                     |                                                                     | 0     | -0.1  | 0     | 0     | 0     |
|                                                                                         | PWY 7456 mann degradation                                           | 0     | -0.1  | 0     | 0     | 0     |
| PWY 7221 guanosine ribonucleotides de novo biosynthesis                                 |                                                                     | 0     | -0.1  | 0     | 0     | 0     |
| HEMESYN2 PWY heme biosynthesis II anaerobic                                             |                                                                     | 0     | -0.1  | 0     | 0     | 0     |
| PWY0 162 superpathway of pyrimidine ribonucleotides de novo biosynthesis                |                                                                     | 0     | -0.1  | 0     | 0     | 0     |
| PWY 6797 6 hydroxymethyl dihydropterin diphosphate biosynthesis II archaea              |                                                                     | 0     | -0.1  | 0     | 0     | 0     |
|                                                                                         | PWY5F9 12 biphenyl degradation                                      | 0     | -0.1  | 0     | 0     | 0     |
| PWY 7090 UDP 2 3 diacetamido 2 3 dideoxy alpha D mannuronate biosynthesis               |                                                                     | 0     | -0.11 | 0     | 0     | 0     |
|                                                                                         | PWY 6785 hydrogen production VIII                                   | 0     | -0.11 | 0     | 0     | 0     |
|                                                                                         | PWY3DJ 35471 L ascorbate biosynthesis IV                            | 0     | -0.11 | 0     | 0     | 0     |
| PWY0 1415 superpathway of heme biosynthesis from uroporphyrinogen III                   |                                                                     | 0     | -0.11 | 0     | 0     | 0     |
| superpathway of UDP N acetylglucosamine derived O antigen building blocks biosynthesis  |                                                                     | 0     | -0.1  | 0     | 0     | 0     |
| PWY 7228 superpathway of guanosine nucleotides de novo biosynthesis I                   |                                                                     | 0     | -0.11 | 0     | 0     | 0     |
|                                                                                         | LYSINE AMINOAD PWY L lysine biosynthesis IV                         | 0     | -0.1  | 0     | 0     | 0     |
| PWY 6572 chondroitin sulfate degradation I bacterial                                    |                                                                     | 0     | -0.1  | 0     | 0     | 0     |
|                                                                                         | PWY 101 photosynthesis light reactions                              | 0     | -0.1  | 0     | 0     | 0     |
| PWY 6467 Kdo transfer to lipid IVA III Chlamydia                                        |                                                                     | 0     | -0.1  | 0     | 0     | 0     |
|                                                                                         | PWY 6174 mevalonate pathway II archaea                              | 0     | -0.1  | 0     | 0     | 0     |
| PWY 6125 superpathway of guanosine nucleotides de novo biosynthesis II                  |                                                                     | 0     | -0.1  | 0     | 0     | 0     |
| PWY 7222 guanosine deoxyribonucleotides de novo biosynthesis II                         |                                                                     | 0     | -0.11 | 0     | 0     | 0     |
| PWY 7220 adenosine deoxyribonucleotides de novo biosynthesis II                         |                                                                     | 0     | -0.11 | 0     | 0     | 0     |
| PWY 6126 superpathway of adenosine nucleotides de novo biosynthesis II                  |                                                                     | 0     | -0.11 | 0     | 0     | 0     |
|                                                                                         | RHAMCAT PWY L rhamnose degradation I                                | 0     | -0.11 | 0     | 0     | 0     |
| DENOVOPURINE2 PWY superpathway of purine nucleotides de novo biosynthesis II            |                                                                     | 0     | -0.11 | 0     | 0     | 0     |
|                                                                                         | PWY0 1479 tRNA processing                                           | 0     | -0.11 | -0.17 | 0     | 0     |
|                                                                                         | PWY 5841 glycogen degradation II eukaryotic                         | 0     | -0.1  | 0     | 0     | -0.13 |
|                                                                                         | PWY 5743 3 hydroxypropanoate cycle                                  | 0     | -0.11 | 0     | 0     | -0.13 |
|                                                                                         | LEU DE2 PWY L leucine degradation I                                 | 0     | -0.1  | 0     | 0     | -0.16 |
|                                                                                         | TRNA CHARGING PWY tRNA charging                                     | 0     | -0.12 | 0     | 0     | -0.13 |
| PWY 5789 3 hydroxypropanoate 4 hydroxybutanoate cycle                                   |                                                                     | 0     | -0.14 | 0     | 0     | -0.13 |
|                                                                                         | PWY 3841 folate transformations II                                  | 0     | 0     | 0     | 0     | -0.14 |
|                                                                                         | PWY 1042 glycolysis IV plant cytosol                                | 0     | 0     | 0     | 0     | -0.13 |
| PWY 7431 aromatic biogenic amine degradation bacteria                                   |                                                                     | 0     | 0     | 0     | 0     | -0.15 |
|                                                                                         | GLUCONEO PWY gluconeogenesis I                                      | 0     | 0     | 0     | 0     | -0.15 |
|                                                                                         | RUMP PWY formaldehyde oxidation I                                   | 0     | -0.14 | 0     | 0.16  | 0     |
| PWY 6901 superpathway of glucose and xylose degradation                                 |                                                                     | 0     | -0.11 | 0     | 0.14  | 0     |
| PWY 7286 7 3 amino 3 carboxypropyl wycosine biosynthesis                                |                                                                     | 0     | 0     | 0     | 0.14  | 0     |
|                                                                                         | PWY 7013 L 1 2 propanediol degradation                              | 0     | 0     | 0     | 0.14  | 0     |
|                                                                                         | PWY 5705 allantoin degradation to glyoxylate III                    | 0     | 0     | 0     | 0.15  | 0     |
|                                                                                         | GLUCARDEG PWY D glucarate degradation I                             | 0     | -0.16 | 0     | -0.14 | 0     |
| DHGLUCONATE PYR CAT PWY glucose degradation oxidative                                   |                                                                     | 0     | -0.15 | 0     | -0.16 | 0     |
|                                                                                         | PWY 5656 mannosylglycerate biosynthesis I                           | 0     | -0.15 | 0     | -0.14 | 0     |
| GLUCARGALACTSUPER PWY superpathway of D glucarate and D galactarate degradation         |                                                                     | 0     | -0.15 | 0     | -0.13 | 0     |
|                                                                                         | GALACTARDEG PWY D galactarate degradation I                         | 0     | -0.15 | 0     | -0.13 | 0     |
| ALL CHORISMATE PWY superpathway of chorismate metabolism                                |                                                                     | 0     | -0.14 | 0     | -0.13 | 0     |
| PWY 5420 catechol degradation II meta cleavage pathway                                  |                                                                     | 0     | -0.11 | 0     | -0.13 | 0     |
| PWY 5419 catechol degradation to 2 oxopent 4 enoate II                                  |                                                                     | 0     | -0.11 | 0     | -0.13 | 0     |
| AEROBACTINSYN PWY aerobactin biosynthesis                                               |                                                                     | 0     | -0.1  | 0     | -0.13 | 0     |
|                                                                                         | PWY 5747 2 methylcitrate cycle II                                   | 0     | -0.1  | 0     | -0.13 | 0     |
|                                                                                         | NAGLIPASYN PWY lipid IVA biosynthesis                               | 0     | -0.11 | 0     | -0.14 | 0     |
| ORNARGDEG PWY superpathway of L arginine and L ornithine degradation                    |                                                                     | 0     | -0.11 | 0     | -0.16 | 0     |
| ARGDEG PWY superpathway of L arginine putrescine and 4 aminobutanoate degradation       |                                                                     | 0     | -0.11 | 0     |       |       |

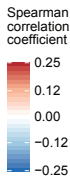

Table S6. Related to Figure 4. FDR values for all significant pathway associations

|                                                                                           | CA(C) |      |      | CA(H) |      | LPS  |      | BF | SA   |   |
|-------------------------------------------------------------------------------------------|-------|------|------|-------|------|------|------|----|------|---|
| PWY66 399 gluconeogenesis III                                                             | 0.18  | 0    | 0    | 0     | 0    | 0    | 0    | 0  | 0    | 0 |
| PWY30 1109 superpathway of 4 hydroxybenzoate biosynthesis yeast                           | 0     | 0    | 0    | 0     | 0    | 0    | 0    | 0  | 0.18 | 0 |
| PWY 6936 seleno amino acid biosynthesis                                                   | 0     | 0    | 0    | 0     | 0    | 0    | 0    | 0  | 0.18 | 0 |
| PWY 6151 S adenosyl L methionine cycle I                                                  | 0     | 0    | 0    | 0     | 0    | 0    | 0    | 0  | 0.18 | 0 |
| PYRIDNUCSAL PWY NAD salvage pathway I                                                     | 0     | 0    | 0    | 0     | 0    | 0    | 0    | 0  | 0.18 | 0 |
| PWY0 1586 peptidoglycan maturation meso diaminiopimelate containing                       | 0     | 0.2  | 0    | 0     | 0    | 0    | 0    | 0  | 0.18 | 0 |
| PWY 7539 6 hydroxymethyl dihydropterin diphosphate biosynthesis III Chlamydia             | 0     | 0.13 | 0.19 | 0     | 0    | 0    | 0    | 0  | 0    | 0 |
| COA PWY 1 coenzyme A biosynthesis I                                                       | 0     | 0.01 | 0    | 0     | 0    | 0.09 | 0    | 0  | 0    | 0 |
| PYRIDNUCSYN PWY NAD biosynthesis I from aspartate                                         | 0     | 0.04 | 0    | 0     | 0    | 0.15 | 0    | 0  | 0    | 0 |
| PWY 5347 superpathway of L methionine biosynthesis transsulfuration                       | 0     | 0.07 | 0    | 0     | 0    | 0    | 0    | 0  | 0    | 0 |
| LACTOSECAT PWY lactose and galactose degradation I                                        | 0     | 0.07 | 0    | 0     | 0    | 0    | 0    | 0  | 0    | 0 |
| PWY 2942 L lysine biosynthesis III                                                        | 0     | 0.06 | 0    | 0     | 0    | 0    | 0    | 0  | 0    | 0 |
| HSERMETANA PWY L methionine biosynthesis III                                              | 0     | 0.06 | 0    | 0     | 0    | 0    | 0    | 0  | 0    | 0 |
| METSYN PWY L methionine biosynthesis III                                                  | 0     | 0.06 | 0    | 0     | 0    | 0    | 0    | 0  | 0    | 0 |
| THRESYN PWY superpathway of L threonine biosynthesis                                      | 0     | 0.11 | 0    | 0     | 0    | 0    | 0    | 0  | 0    | 0 |
| PWY 6608 guanosine nucleotides degradation III                                            | 0     | 0.13 | 0    | 0     | 0    | 0    | 0    | 0  | 0    | 0 |
| PWY 7357 thiamin formation from pyriothiamine and oxythiamine yeast                       | 0     | 0.05 | 0    | 0     | 0    | 0    | 0    | 0  | 0    | 0 |
| PWY 724 superpathway of L lysine L threonine and L methionine biosynthesis II             | 0     | 0.05 | 0    | 0     | 0    | 0    | 0    | 0  | 0    | 0 |
| PWY 6124 inosine 5 phosphate biosynthesis II                                              | 0     | 0.04 | 0    | 0     | 0    | 0    | 0    | 0  | 0    | 0 |
| PWY 6353 purine nucleotide degradation II aerobic                                         | 0     | 0.05 | 0    | 0     | 0    | 0    | 0    | 0  | 0    | 0 |
| PWY 5097 L lysine biosynthesis VI                                                         | 0     | 0.05 | 0    | 0     | 0    | 0    | 0    | 0  | 0    | 0 |
| PWY0 1296 purine ribonucleosides degradation                                              | 0     | 0.16 | 0    | 0     | 0    | 0    | 0    | 0  | 0    | 0 |
| MET SAM PWY superpathway of S adenosyl L methionine biosynthesis                          | 0     | 0.15 | 0    | 0     | 0    | 0    | 0    | 0  | 0    | 0 |
| CODH PWY reductive acetyl coenzyme A pathway                                              | 0     | 0.17 | 0    | 0     | 0    | 0    | 0    | 0  | 0    | 0 |
| PWY68 422 D galactose degradation V Leloir pathway                                        | 0     | 0.17 | 0    | 0     | 0    | 0    | 0    | 0  | 0    | 0 |
| PWY 6317 galactose degradation I Leloir pathway                                           | 0     | 0.2  | 0    | 0     | 0    | 0    | 0    | 0  | 0    | 0 |
| PWY 6628 superpathway of L phenylalanine biosynthesis                                     | 0     | 0.2  | 0    | 0     | 0    | 0    | 0    | 0  | 0    | 0 |
| PWY0 1297 superpathway of purine deoxyribonucleosides degradation                         | 0     | 0.19 | 0    | 0     | 0    | 0    | 0    | 0  | 0    | 0 |
| PWY 621 sucrose degradation III sucrose invertase                                         | 0.19  | 0.05 | 0    | 0     | 0    | 0    | 0.12 | 0  | 0    | 0 |
| PWY 5989 stearate biosynthesis II bacteria and plants                                     | 0.19  | 0.02 | 0    | 0     | 0    | 0    | 0.12 | 0  | 0    | 0 |
| PWY 5973 cis vacuole biosynthesis                                                         | 0.18  | 0.02 | 0    | 0     | 0    | 0    | 0.16 | 0  | 0    | 0 |
| PWY 5367 petroselinat biosynthesis                                                        | 0.13  | 0.04 | 0    | 0     | 0    | 0    | 0.12 | 0  | 0    | 0 |
| PWY 6113 superpathway of mycolate biosynthesis                                            | 0     | 0.1  | 0    | 0     | 0    | 0    | 0.12 | 0  | 0    | 0 |
| PWY 5695 urate biosynthesis inosine 5 phosphate degradation                               | 0     | 0.13 | 0    | 0     | 0    | 0    | 0.12 | 0  | 0    | 0 |
| PWY 7199 pyrimidine deoxyribonucleosides salvage                                          | 0     | 0.19 | 0    | 0     | 0    | 0    | 0.07 | 0  | 0    | 0 |
| RIBOSYN2 PWY flavin biosynthesis I bacteria and plants                                    | 0     | 0.13 | 0    | 0     | 0    | 0    | 0.03 | 0  | 0    | 0 |
| PWY 6282 palmitoleate biosynthesis I from 5Z dodec 5 enoate                               | 0     | 0.04 | 0    | 0     | 0    | 0    | 0.12 | 0  | 0    | 0 |
| PWY 7663 gondate biosynthesis anaerobic                                                   | 0     | 0    | 0    | 0     | 0    | 0    | 0.15 | 0  | 0    | 0 |
| PWY 6318 L phenylalanine degradation IV mammalian via side chain                          | 0     | 0    | 0    | 0     | 0    | 0    | 0.15 | 0  | 0    | 0 |
| PWY G 321 mycolate biosynthesis                                                           | 0     | 0    | 0    | 0     | 0    | 0    | 0.14 | 0  | 0    | 0 |
| PWY 7000 kanamycin biosynthesis                                                           | 0     | 0    | 0    | 0     | 0    | 0    | 0.16 | 0  | 0    | 0 |
| PWY 5971 palmitate biosynthesis II bacteria and plants                                    | 0     | 0    | 0    | 0     | 0    | 0    | 0.12 | 0  | 0    | 0 |
| FASYN ELONG PWY fatty acid elongation saturated                                           | 0     | 0    | 0    | 0     | 0    | 0    | 0.12 | 0  | 0    | 0 |
| PWY 6098 diplosterol and cycloartenol biosynthesis                                        | 0     | 0    | 0    | 0     | 0    | 0    | 0.1  | 0  | 0    | 0 |
| PWY 7282 4 amino 2 methyl 5 phosphomethylpyrimidine biosynthesis yeast                    | 0     | 0    | 0    | 0.11  | 0.09 | 0    | 0    | 0  | 0    | 0 |
| PWY 5306 superpathway of thiosulfate metabolism Desulfovibrio sulfodismutans              | 0.06  | 0.13 | 0    | 0     | 0    | 0    | 0    | 0  | 0    | 0 |
| PWY 2221 Entner Doudoroff pathway II semi phosphorylative                                 | 0.13  | 0.06 | 0    | 0     | 0    | 0    | 0    | 0  | 0    | 0 |
| PYRIDOXSYN PWY pyridoxal 5 phosphate biosynthesis I                                       | 0.13  | 0    | 0    | 0     | 0    | 0    | 0    | 0  | 0    | 0 |
| PWY0 845 superpathway of pyridoxal 5 phosphate biosynthesis and salvage                   | 0.18  | 0.01 | 0    | 0     | 0    | 0    | 0    | 0  | 0    | 0 |
| PWY 7388 octanoyl acyl carrier protein biosynthesis mitochondria yeast                    | 0.06  | 0.01 | 0    | 0     | 0    | 0    | 0    | 0  | 0.18 | 0 |
| PWY 5994 palmitate biosynthesis I animals and fungi                                       | 0.06  | 0.01 | 0    | 0     | 0    | 0    | 0    | 0  | 0.18 | 0 |
| PWY0 1261 anhydromuropeptides recycling                                                   | 0.13  | 0.01 | 0    | 0     | 0    | 0.04 | 0    | 0  | 0    | 0 |
| PWY 5081 L tryptophan degradation VIII to tryptophol                                      | 0.13  | 0    | 0    | 0     | 0    | 0.15 | 0    | 0  | 0.01 | 0 |
| PWY 5873 ubiquinol 7 biosynthesis eukaryotic                                              | 0     | 0.04 | 0    | 0     | 0    | 0    | 0    | 0  | 0    | 0 |
| PWY 5871 ubiquinol 9 biosynthesis eukaryotic                                              | 0     | 0.04 | 0    | 0     | 0    | 0    | 0    | 0  | 0    | 0 |
| PWY 5872 ubiquinol 10 biosynthesis eukaryotic                                             | 0     | 0.04 | 0    | 0     | 0    | 0    | 0    | 0  | 0    | 0 |
| P108 PWY pyruvate fermentation to propanoate I                                            | 0     | 0.04 | 0    | 0     | 0    | 0    | 0    | 0  | 0    | 0 |
| PWY 6215 4 chlorobenzoate degradation                                                     | 0     | 0.04 | 0    | 0     | 0    | 0    | 0    | 0  | 0    | 0 |
| P162 PWY L glutamate degradation V via hydroxyglutarate                                   | 0     | 0.04 | 0    | 0     | 0    | 0    | 0    | 0  | 0    | 0 |
| PWY 5392 reductive TCA cycle II                                                           | 0     | 0.04 | 0    | 0     | 0    | 0    | 0    | 0  | 0    | 0 |
| PWY 6383 mono trans poly cis decaprenyl phosphate biosynthesis                            | 0     | 0.04 | 0    | 0     | 0    | 0    | 0    | 0  | 0    | 0 |
| PWY 5532 adenosine nucleotides degradation IV                                             | 0     | 0.04 | 0    | 0     | 0    | 0    | 0    | 0  | 0    | 0 |
| P42 PWY incomplete reductive TCA cycle                                                    | 0     | 0.04 | 0    | 0     | 0    | 0    | 0    | 0  | 0    | 0 |
| THREOCAT PWY superpathway of L threonine metabolism                                       | 0     | 0.04 | 0    | 0     | 0    | 0    | 0    | 0  | 0    | 0 |
| PWY 5870 ubiquinol 8 biosynthesis eukaryotic                                              | 0     | 0.04 | 0    | 0     | 0    | 0    | 0    | 0  | 0    | 0 |
| P23 PWY reductive TCA cycle I                                                             | 0     | 0.04 | 0    | 0     | 0    | 0    | 0    | 0  | 0    | 0 |
| X4 HYDROXYMANDELATE DEGRADATION PWY 4 hydroxymandelate degradation                        | 0     | 0.04 | 0    | 0     | 0    | 0    | 0    | 0  | 0    | 0 |
| CITRULBIO PWY L citrulline biosynthesis                                                   | 0     | 0.04 | 0    | 0     | 0    | 0    | 0    | 0  | 0    | 0 |
| PWY 6145 superpathway of sialic acids and CMP sialic acids biosynthesis                   | 0     | 0.04 | 0    | 0     | 0    | 0    | 0    | 0  | 0    | 0 |
| PWY 6841 superpathway of sulfolactate degradation                                         | 0     | 0.04 | 0    | 0     | 0    | 0    | 0    | 0  | 0    | 0 |
| PWY30 19 ubiquinol 6 biosynthesis from 4 hydroxybenzoate eukaryotic                       | 0     | 0.04 | 0    | 0     | 0    | 0    | 0    | 0  | 0    | 0 |
| ARGININE SYN4 PWY L ornithine de novo biosynthesis                                        | 0     | 0.04 | 0    | 0     | 0    | 0    | 0    | 0  | 0    | 0 |
| PWY 6138 CMP N acetylneuraminate biosynthesis I eukaryotes                                | 0     | 0.02 | 0    | 0     | 0    | 0    | 0    | 0  | 0    | 0 |
| PWY 4981 L proline biosynthesis II from arginine                                          | 0     | 0.01 | 0    | 0     | 0    | 0    | 0    | 0  | 0    | 0 |
| REDCTCTCYC TCA cycle VIII helicobacter                                                    | 0     | 0.05 | 0    | 0     | 0    | 0    | 0    | 0  | 0    | 0 |
| P161 PWY acetylene degradation                                                            | 0     | 0.05 | 0    | 0     | 0    | 0    | 0    | 0  | 0    | 0 |
| PWY30 355 stearate biosynthesis III fungi                                                 | 0     | 0.05 | 0    | 0     | 0    | 0    | 0    | 0  | 0    | 0 |
| X3 HYDROXYPHENYLACETATE DEGRADATION PWY 4 hydroxyphenylacetate degradation                | 0     | 0.05 | 0    | 0     | 0    | 0    | 0    | 0  | 0    | 0 |
| PWY 6708 ubiquinol 8 biosynthesis prokaryotic                                             | 0     | 0.05 | 0    | 0     | 0    | 0    | 0    | 0  | 0    | 0 |
| POLYAMINSYN3 PWY superpathway of polyamine biosynthesis II                                | 0     | 0.05 | 0    | 0     | 0    | 0    | 0    | 0  | 0    | 0 |
| VALDEG PWY L valine degradation I                                                         | 0     | 0.04 | 0    | 0     | 0    | 0    | 0    | 0  | 0    | 0 |
| UBISYN PWY superpathway of ubiquinol 8 biosynthesis prokaryotic                           | 0     | 0.04 | 0    | 0     | 0    | 0    | 0    | 0  | 0    | 0 |
| PWY 7200 superpathway of pyrimidine deoxyribonucleoside salvage                           | 0     | 0.05 | 0    | 0     | 0    | 0    | 0    | 0  | 0    | 0 |
| PWY 4984 urea cycle                                                                       | 0     | 0.05 | 0    | 0     | 0    | 0    | 0    | 0  | 0    | 0 |
| PWY 7197 pyrimidine deoxyribonucleotide phosphorylation                                   | 0     | 0.05 | 0    | 0     | 0    | 0    | 0    | 0  | 0    | 0 |
| PWY 5484 glycolysis II from fructose 6 phosphate                                          | 0     | 0.06 | 0    | 0     | 0    | 0    | 0    | 0  | 0    | 0 |
| PWY 5173 superpathway of acetyl CoA biosynthesis                                          | 0     | 0.06 | 0    | 0     | 0    | 0    | 0    | 0  | 0    | 0 |
| PWY6666 2 dopamine degradation                                                            | 0     | 0.06 | 0    | 0     | 0    | 0    | 0    | 0  | 0    | 0 |
| PWY 6969 TCA cycle V 2 oxoglutarate ferredoxin oxidoreductase                             | 0     | 0.06 | 0    | 0     | 0    | 0    | 0    | 0  | 0    | 0 |
| PWY 6769 rhannogalacturonan type I degradation I fungi                                    | 0.13  | 0.06 | 0    | 0     | 0    | 0    | 0    | 0  | 0    | 0 |
| PWY 6143 CMP pseudaminat biosynthesis                                                     | 0     | 0.06 | 0    | 0     | 0    | 0    | 0    | 0  | 0    | 0 |
| P163 PWY L lysine fermentation to acetate and butanoate                                   | 0     | 0.06 | 0    | 0     | 0    | 0    | 0    | 0  | 0    | 0 |
| PWY68 398 TCA cycle III animals                                                           | 0     | 0.13 | 0    | 0     | 0    | 0    | 0    | 0  | 0    | 0 |
| PWY 7654 8E 10E dodeca 8 10 dienol biosynthesis                                           | 0     | 0.06 | 0    | 0     | 0    | 0    | 0    | 0  | 0    | 0 |
| PWY 3661 glycine betaine degradation I                                                    | 0     | 0.11 | 0    | 0     | 0    | 0    | 0    | 0  | 0    | 0 |
| P562 PWY myo inositol degradation I                                                       | 0     | 0.12 | 0    | 0     | 0    | 0    | 0    | 0  | 0    | 0 |
| PWY 6703 preQ0 biosynthesis                                                               | 0     | 0.13 | 0    | 0     | 0    | 0    | 0    | 0  | 0    | 0 |
| HISDEG PWY L histidine degradation I                                                      | 0     | 0.13 | 0    | 0     | 0    | 0    | 0    | 0  | 0    | 0 |
| PWY 7385 1 3 propanediol biosynthesis engineered                                          | 0     | 0.13 | 0    | 0     | 0    | 0    | 0    | 0  | 0    | 0 |
| PWY 5055 nicotinate degradation III                                                       | 0     | 0.13 | 0    | 0     | 0    | 0    | 0    | 0  | 0    | 0 |
| PWY 6147 6 hydroxymethyl dihydropterin diphosphate biosynthesis I                         | 0     | 0.13 | 0    | 0     | 0    | 0    | 0    | 0  | 0    | 0 |
| PWY 1861 formaldehyde assimilation II RuMP Cycle                                          | 0     | 0.13 | 0    | 0     | 0    | 0    | 0    | 0  | 0    | 0 |
| FOLSYN PWY superpathway of tetrahydrofolate biosynthesis and salvage                      | 0     | 0.13 | 0    | 0     | 0    | 0    | 0    | 0  | 0    | 0 |
| PWY 6612 superpathway of tetrahydrofolate biosynthesis                                    | 0     | 0.13 | 0    | 0     | 0    | 0    | 0    | 0  | 0    | 0 |
| PWY 2201 folate transformations I                                                         | 0     | 0.13 | 0    | 0     | 0    | 0    | 0    | 0  | 0    | 0 |
| PWY0 42 2 methylcitrate cycle I                                                           | 0     | 0.13 | 0    | 0     | 0    | 0    | 0    | 0  | 0    | 0 |
| PWY 821 superpathway of sulfur amino acid biosynthesis Saccharomyces cerevisiae           | 0     | 0.14 | 0    | 0     | 0    | 0    | 0    | 0  | 0    | 0 |
| P3 PWY gallate degradation III anaerobic                                                  | 0     | 0.15 | 0    | 0     | 0    | 0    | 0    | 0  | 0    | 0 |
| PWY 7024 superpathway of the 3 hydroxypropanoate cycle                                    | 0     | 0.09 | 0    | 0     | 0    | 0    | 0    | 0  | 0    | 0 |
| PWY 5744 glyoxylate assimilation                                                          | 0     | 0.09 | 0    | 0     | 0    | 0    | 0    | 0  | 0    | 0 |
| PWY 5724 superpathway of atrazine degradation                                             | 0     | 0.09 | 0    | 0     | 0    | 0    | 0    | 0  | 0    | 0 |
| PWY 6863 pyruvate fermentation to hexanol                                                 | 0     | 0.09 | 0    | 0     | 0    | 0    | 0    | 0  | 0    | 0 |
| TCA TCA cycle I prokaryotic                                                               | 0     | 0.09 | 0    | 0     | 0    | 0    | 0    | 0  | 0    | 0 |
| P241 PWY coenzyme B biosynthesis                                                          | 0     | 0.08 | 0    | 0     | 0    | 0    | 0    | 0  | 0    | 0 |
| PWY 7196 superpathway of pyrimidine ribonucleosides salvage                               | 0     | 0.09 | 0    | 0     | 0    | 0    | 0    | 0  | 0    | 0 |
| P261 PWY coenzyme M biosynthesis I                                                        | 0     | 0.09 | 0    | 0     | 0    | 0    | 0    | 0  | 0    | 0 |
| PWY 5464 superpathway of cytosolic glycolysis plants pyruvate dehydrogenase and TCA cycle | 0     | 0.09 | 0    | 0     | 0    | 0    | 0    | 0  | 0    | 0 |
| PWY 5181 toluene degradation III aerobic via p cresol                                     | 0     | 0.09 | 0    | 0     | 0    | 0    | 0    | 0  | 0    | 0 |
| ANAGLYCOLYSIS PWY glycolysis III from glucose                                             | 0     | 0.09 | 0    | 0     | 0    | 0    | 0    | 0  | 0    | 0 |
| PWY 5138 unsaturated even numbered fatty acid beta oxidation                              | 0     | 0.08 | 0    | 0     | 0    | 0    | 0    | 0  | 0    | 0 |
| ANAEROFFLUAT PWY homolactic fermentation                                                  | 0     | 0.07 | 0    | 0     | 0    | 0    | 0    | 0  | 0    | 0 |
| PWY 5030 L histidine degradation III                                                      | 0     | 0.07 | 0    | 0     | 0    | 0    | 0    | 0  | 0    | 0 |
| PWY 6834 spermidine biosynthesis III                                                      | 0     | 0.18 | 0    | 0     | 0    | 0    | 0    | 0  | 0    | 0 |
| DENITRIFICATION PWY nitrate reduction I denitrification                                   | 0     | 0.18 | 0    | 0     | 0    | 0    | 0    | 0  | 0    | 0 |
| PWY 7208 superpathway of pyrimidine nucleobases salvage                                   | 0     | 0.18 | 0    | 0     | 0    | 0    | 0    | 0  | 0    | 0 |
| PWY 6471 peptidoglycan biosynthesis IV Enterococcus faecium                               | 0     | 0.18 | 0    | 0     | 0    | 0    | 0    | 0  | 0    | 0 |
| PWY 6305 putrescine biosynthesis IV                                                       | 0     | 0.18 | 0    | 0     | 0    | 0    | 0    | 0  | 0    | 0 |
| PWY 5179 toluene degradation V aerobic via toluene cis diol                               | 0     | 0.18 | 0    | 0     | 0    | 0    | 0    | 0  | 0    | 0 |
| PWY 7184 pyrimidine deoxyribonucleotides de novo biosynthesis I                           | 0     | 0.18 | 0    | 0     | 0    | 0    | 0    | 0  | 0    | 0 |
| P184 PWY protocatechuate degradation I meta cleavage pathway                              | 0     | 0.18 | 0    | 0     | 0    | 0    | 0    | 0  | 0    | 0 |
| PWY 7211 superpathway of pyrimidine deoxyribonucleotides de novo biosynthesis             | 0     | 0.18 | 0    | 0     | 0    | 0    | 0    | 0  | 0    | 0 |
| PROTocatechuate ORTHO CLEAVAGE PWY protocatechuate degradation II ortho cleavage pathway  | 0     | 0.19 | 0    | 0     | 0    | 0    | 0    | 0  | 0    | 0 |
| PWY 7389 superpathway of anaerobic energy metabolism invertebrates                        | 0     | 0.19 | 0    | 0     | 0    | 0    | 0    | 0  | 0    | 0 |
| PWY 561 superpathway of glyoxylate cycle and fatty acid degradation                       | 0     | 0.19 | 0    | 0     | 0    | 0    | 0    | 0  | 0    | 0 |
| LPSSYN PWY superpathway of lipopolysaccharide biosynthesis                                | 0     | 0.19 | 0    | 0     | 0    | 0    | 0    | 0  | 0    | 0 |
| PWY 7210 pyrimidine deoxyribonucleotides biosynthesis from CTP                            | 0     | 0.19 | 0    | 0     | 0    | 0    | 0    | 0  | 0    | 0 |
| CENTIFERM PWY pyruvate fermentation to butanoate                                          | 0     | 0.19 | 0    | 0     | 0    |      |      |    |      |   |

Table S7. Related to Figure 4. Correlation coefficients for all significant GO category associations

|                                                                                           | CA(C)           | CA(H) | LPS   | BF    | SA         |
|-------------------------------------------------------------------------------------------|-----------------|-------|-------|-------|------------|
| GO:0007067 BP 04 mitotic nuclear division                                                 | -0.11           | 0     | 0     | 0     | -0.09      |
| GO:0002697 BP 04 regulation of immune effector process                                    | -0.09           | 0     | 0     | 0     | -0.12      |
| GO:0043408 BP 06 regulation of MAPK cascade                                               | -0.1            | 0     | 0     | 0     | -0.11      |
| GO:0016999 BP 04 antibiotic metabolic process                                             | -0.09           | 0     | 0     | 0     | -0.12      |
| GO:0060633 BP 05 fatty acid biosynthetic process                                          | -0.1            | 0     | 0     | 0     | -0.12      |
| GO:0042176 BP 05 regulation of protein catabolic process                                  | -0.1            | 0     | -0.1  | 0     | -0.1       |
| GO:0009060 BP 05 aerobic respiration                                                      | -0.11           | 0     | -0.1  | 0     | -0.1       |
| GO:0001172 BP 07 transcription RNA templated                                              | -0.11           | 0     | -0.09 | 0     | -0.11      |
| GO:0006633 BP 05 fatty acid biosynthetic process                                          | 0               | 0     | 0     | 0     | -0.09      |
| GO:0006265 BP 06 DNA topological change                                                   | 0               | 0     | 0     | 0     | -0.09      |
| GO:0007169 BP 06 transmembrane receptor protein tyrosine kinase signaling pathway         | 0               | 0     | 0     | 0     | -0.09      |
| GO:0006898 BP 06 receptor mediated endocytosis                                            | 0               | 0     | 0     | 0     | -0.1       |
| GO:0009226 BP 05 nucleotide sugar biosynthetic process                                    | 0               | 0     | 0     | 0     | -0.09      |
| GO:0006278 BP 06 RNA dependent DNA replication                                            | 0               | 0     | 0     | 0     | -0.09      |
| GO:0030243 BP 07 cellulose metabolic process                                              | 0               | 0     | 0     | 0     | -0.09      |
| GO:0006730 BP 03 one carbon metabolic process                                             | 0               | 0     | 0     | 0     | -0.09      |
| GO:0032956 BP 05 regulation of actin cytoskeleton organization                            | 0               | 0     | 0     | 0     | -0.12      |
| GO:0008284 BP 05 positive regulation of cell proliferation                                | 0               | 0     | 0     | 0     | -0.12      |
| GO:0030334 BP 05 regulation of cell migration                                             | 0               | 0     | 0     | 0     | -0.11      |
| GO:0048598 BP 03 embryonic morphogenesis                                                  | -0.12           | 0     | -0.1  | 0     | -0.13      |
| GO:0016477 BP 03 cell migration                                                           | -0.12           | 0     | -0.1  | 0     | -0.13      |
| GO:0048731 BP 03 system development                                                       | -0.11           | 0     | -0.1  | 0     | -0.12      |
| GO:0071345 BP 05 cellular response to cytokine stimulus                                   | -0.09           | 0     | -0.1  | 0     | -0.16      |
| GO:0022446 BP 03 membrane docking                                                         | -0.11           | 0     | 0     | 0     | -0.12      |
| GO:0010927 BP 03 cellular component assembly involved in morphogenesis                    | -0.12           | 0     | 0     | 0     | -0.12      |
| GO:0045944 BP 08 positive regulation of transcription from RNA polymerase II promoter     | 0               | 0     | 0     | 0     | -0.09      |
| GO:0007229 BP 05 integrin mediated signaling pathway                                      | -0.11           | 0     | 0     | 0     | -0.12      |
| GO:0006269 BP 05 DNA replication synthesis of RNA primer                                  | -0.09           | 0     | 0.17  | 0     | -0.12      |
| GO:0005961 BP 04 trehalose metabolic process                                              | -0.14           | 0     | 0     | 0     | 0          |
| GO:0007005 BP 03 mitochondrion organization                                               | -0.13           | 0     | 0     | 0     | 0          |
| GO:0043254 BP 04 regulation of protein complex assembly                                   | -0.12           | 0     | 0     | 0     | 0          |
| GO:0051129 BP 04 negative regulation of cellular component organization                   | -0.11           | 0     | 0     | 0     | 0          |
| GO:003275 BP 05 DNA methylation on adenine                                                | -0.11           | 0     | 0     | 0     | 0          |
| GO:0001101 BP 03 response to acid chemical                                                | -0.11           | 0     | 0     | 0     | 0          |
| GO:0018298 BP 06 protein chromosome linkage                                               | -0.11           | 0     | 0     | 0     | 0          |
| GO:0007018 BP 04 microtubule based movement                                               | -0.1            | 0     | 0     | 0     | 0          |
| GO:0006338 BP 05 chromatin remodeling                                                     | -0.1            | 0     | 0     | 0     | 0          |
| GO:0006826 BP 07 iron ion transport                                                       | -0.1            | 0     | 0     | 0     | 0          |
| GO:0006099 BP 03 tricarboxylic acid cycle                                                 | -0.09           | 0     | 0     | 0     | 0          |
| GO:0030488 BP 05 tRNA methylation                                                         | -0.13-0.12      | 0     | 0     | 0     | 0          |
| GO:0010243 BP 03 response to organonitrogen compound                                      | -0.11-0.11      | 0     | 0     | 0     | 0          |
| GO:0040007 BP 01 growth                                                                   | -0.09-0.11-0.13 | 0     | 0     | 0     | 0          |
| GO:0006450 BP 03 regulation of translational fidelity                                     | -0.12-0.15-0.14 | 0     | 0     | 0     | 0          |
| GO:0001817 BP 04 regulation of cytokine production                                        | -0.09-0.17-0.11 | 0     | 0     | 0     | 0          |
| GO:0045860 BP 07 positive regulation of protein kinase activity                           | -0.1-0.12-0.12  | -0.1  | 0     | 0     | 0          |
| GO:0051050 BP 04 positive regulation of transport                                         | -0.12-0.14      | 0     | 0     | 0     | 0          |
| GO:0006486 BP 03 protein glycosylation                                                    | -0.14-0.1       | 0     | 0     | 0     | 0          |
| GO:0007264 BP 05 small GTPase mediated signal transduction                                | -0.12-0.11      | 0     | 0     | 0     | 0          |
| GO:0006744 BP 06 ubiquinone biosynthetic process                                          | -0.12-0.11      | 0     | 0     | 0     | 0          |
| GO:0034614 BP 05 cellular response to reactive oxygen species                             | -0.11-0.09      | 0     | 0     | 0     | 0          |
| GO:0009307 BP 05 DNA restriction modification system                                      | -0.1-0.11       | 0     | 0     | 0     | 0          |
| GO:0009148 BP 06 pyrimidine nucleoside triphosphate biosynthetic process                  | -0.1-0.11       | 0     | 0     | 0     | 0          |
| GO:0045786 BP 05 negative regulation of cell cycle                                        | -0.09-0.11      | 0     | 0     | 0     | 0          |
| GO:0034765 BP 05 regulation of ion transmembrane transport                                | -0.1-0.11       | -0.12 | 0     | 0     | 0          |
| GO:0032101 BP 04 regulation of response to external stimulus                              | -0.12-0.12      | 0     | -0.12 | 0     | 0          |
| GO:0051223 BP 05 regulation of protein transport                                          | -0.1-0.23       | 0     | 0     | 0     | 0          |
| GO:0007015 BP 05 actin filament organization                                              | -0.11-0.12      | -0.14 | 0     | 0     | 0          |
| GO:0007015 BP 05 actin filament organization                                              | -0.13-0.14      | -0.17 | 0     | -0.14 | 0          |
| GO:0006546 BP 07 glycine catabolic process                                                | -0.16-0.15      | 0     | -0.14 | 0     | -0.12      |
| GO:0043068 BP 06 positive regulation of programmed cell death                             | -0.12-0.09      | 0     | -0.11 | 0     | -0.14      |
| GO:0031347 BP 05 regulation of defense response                                           | -0.12-0.09      | 0     | -0.11 | 0     | -0.14      |
| GO:0030346 BP 04 meiotic cell cycle process                                               | -0.13-0.14      | 0     | -0.12 | 0     | -0.14      |
| GO:0022412 BP 03 cellular process involved in reproduction in multicellular organism      | -0.1-0.14       | 0     | -0.12 | 0     | -0.15      |
| GO:0016458 BP 03 gene silencing                                                           | -0.09-0.14      | 0     | -0.12 | 0     | -0.15      |
| GO:0008285 BP 05 negative regulation of cell proliferation                                | -0.12-0.14      | 0     | -0.1  | 0     | -0.16      |
| GO:0048183 BP 04 Golgi vesicle transport                                                  | -0.09-0.17      | 0     | -0.11 | 0     | -0.14      |
| GO:0051260 BP 07 protein homooligomerization                                              | -0.11-0.13      | 0     | -0.11 | 0     | -0.12      |
| GO:0007275 BP 03 multicellular organismal development                                     | -0.12-0.12      | 0     | -0.1  | 0     | -0.12      |
| GO:0008283 BP 02 cell proliferation                                                       | -0.1-0.13       | 0     | -0.1  | 0     | -0.13      |
| GO:0008296 BP 03 glycolytic process                                                       | -0.12-0.12      | 0     | -0.09 | 0     | -0.09      |
| GO:0018567 BP 08 protein ubiquitination                                                   | -0.11-0.14      | 0     | -0.09 | 0     | -0.1       |
| GO:0055072 BP 09 iron ion homeostasis                                                     | -0.12-0.16      | 0     | -0.12 | 0     | -0.09      |
| GO:0046916 BP 08 cellular transition metal ion homeostasis                                | -0.12-0.15      | 0     | -0.12 | 0     | -0.09      |
| GO:1902533 BP 06 positive regulation of intracellular signal transduction                 | -0.09-0.15      | 0     | -0.14 | 0     | -0.1       |
| GO:0008202 BP 04 steroid metabolic process                                                | -0.1-0.14       | 0     | 0     | 0     | -0.13      |
| GO:1903530 BP 05 regulation of secretion by cell                                          | -0.13-0.17      | 0     | 0     | 0     | -0.1       |
| GO:0044247 BP 05 cellular polysaccharide catabolic process                                | -0.12-0.16      | 0     | 0     | 0     | -0.09      |
| GO:0009251 BP 06 glucan catabolic process                                                 | -0.13-0.12      | 0     | 0     | 0     | -0.14      |
| GO:0006913 BP 06 nucleocytoplasmic transport                                              | -0.13-0.12      | 0     | 0     | 0     | -0.11      |
| GO:0050568 BP 04 RNA transport                                                            | -0.13-0.1       | 0     | 0     | 0     | -0.12      |
| GO:0051240 BP 04 positive regulation of multicellular organismal process                  | -0.1-0.1        | 0     | 0     | 0     | -0.11      |
| GO:0006418 BP 06 tRNA aminoacylation for protein translation                              | -0.1-0.11       | 0     | 0     | 0     | -0.1       |
| GO:0009888 BP 03 tissue development                                                       | -0.1            | 0.12  | -0.11 | 0     | -0.14      |
| GO:0006954 BP 04 inflammatory response                                                    | -0.12           | 0.14  | -0.09 | 0     | -0.12      |
| GO:0000226 BP 04 microtubule cytoskeleton organization                                    | -0.09-0.12      | 0.14  | -0.1  | 0     | -0.16      |
| GO:0042537 BP 04 benzene containing compound metabolic process                            | -0.13-0.14      | 0     | -0.1  | 0     | 0.13       |
| GO:0006511 BP 07 ubiquitin dependent protein catabolic process                            | -0.14-0.12      | 0     | -0.12 | 0     | -0.14      |
| GO:0043900 BP 03 regulation of multi organism process                                     | -0.14-0.16-0.12 | 0     | -0.1  | 0     | -0.09      |
| GO:0051235 BP 02 maintenance of location                                                  | -0.09-0.17      | 0     | -0.11 | -0.17 | -0.12      |
| GO:0009292 BP 03 genetic transfer                                                         | -0.11           | 0     | -0.1  | -0.16 | -0.11      |
| GO:0032776 BP 05 DNA methylation on cytosine                                              | -0.14           | 0     | -0.13 | 0     | -0.18      |
| GO:0030036 BP 04 actin cytoskeleton organization                                          | -0.13           | 0     | -0.09 | 0     | -0.14      |
| GO:0008915 BP 05 apoptotic process                                                        | -0.13-0.12-0.12 | 0     | -0.1  | 0     | -0.14      |
| GO:0000075 BP 04 cell cycle checkpoint                                                    | -0.13-0.09-0.12 | 0     | -0.1  | 0     | -0.14      |
| GO:0016573 BP 04 histone acetylation                                                      | -0.12           | 0     | -0.13 | 0     | -0.13      |
| GO:0007267 BP 03 cell cell signaling                                                      | -0.11           | -0.16 | 0.15  | 0     | -0.15      |
| GO:0006266 BP 05 DNA ligation                                                             | -0.1            | -0.14 | 0.14  | 0.35  | -0.13      |
| GO:0017004 BP 07 cytochrome complex assembly                                              | -0.09           | 0     | 0     | 0     | 0          |
| GO:0000737 BP 06 DNA catabolic process endonucleolytic                                    | -0.09           | 0     | 0     | 0     | 0          |
| GO:0042157 BP 04 lipoprotein metabolic process                                            | -0.09           | 0     | 0     | 0     | 0          |
| GO:0007155 BP 03 cell wall organization                                                   | -0.1            | 0     | 0     | 0     | 0          |
| GO:0006662 BP 04 glycerol ether metabolic process                                         | -0.1            | 0     | 0     | 0     | 0          |
| GO:0038032 BP 07 termination of G protein coupled receptor signaling pathway              | -0.12           | 0     | 0     | 0     | 0          |
| GO:0006801 BP 04 superoxide metabolic process                                             | -0.12           | 0     | -0.1  | 0     | 0          |
| GO:0051701 BP 03 interaction with host                                                    | 0               | 0     | -0.11 | 0     | 0          |
| GO:0016032 BP 03 viral process                                                            | 0               | 0     | -0.11 | 0     | 0          |
| GO:0006677 BP 04 response to antibiotic                                                   | 0               | 0     | -0.11 | 0     | 0          |
| GO:0045454 BP 04 cell redox homeostasis                                                   | 0               | 0     | -0.12 | 0     | 0          |
| GO:0006889 BP 03 lipid transport                                                          | 0               | 0     | -0.09 | 0     | 0          |
| GO:0006662 BP 04 glycerol ether metabolic process                                         | 0               | 0     | -0.09 | 0     | 0          |
| GO:0006352 BP 06 DNA templated transcription initiation                                   | 0               | 0     | -0.1  | 0     | -0.09      |
| GO:0040008 BP 03 regulation of growth                                                     | -0.1            | -0.16 | 0     | 0     | 0          |
| GO:0006563 BP 06 L-serine metabolic process                                               | -0.1            | 0     | -0.12 | 0     | -0.09      |
| GO:0016055 BP 05 Wnt signaling pathway                                                    | 0               | -0.13 | 0     | 0     | 0          |
| GO:0045087 BP 03 innate immune response                                                   | 0               | 0     | 0     | 0     | 0          |
| GO:0006402 BP 06 mRNA catabolic process                                                   | 0               | 0     | 0     | 0     | 0          |
| GO:0019184 BP 06 nonribosomal peptide biosynthetic process                                | -0.1            | 0.14  | 0     | 0     | 0          |
| GO:1901590 BP 06 regulation of mitotic cell cycle phase transition                        | 0               | 0     | 0     | 0     | 0          |
| GO:0050778 BP 05 positive regulation of immune response                                   | 0               | 0.14  | 0     | 0     | 0          |
| GO:0006094 BP 07 gluconeogenesis                                                          | -0.09           | 0.13  | 0     | 0     | -0.12      |
| GO:0006414 BP 05 translational elongation                                                 | 0               | 0.14  | 0.14  | 0     | 0          |
| GO:0006281 BP 06 DNA dependent DNA replication                                            | 0               | 0.15  | 0.14  | 0     | 0          |
| GO:0009423 BP 07 chorismate biosynthetic process                                          | 0               | 0     | 0     | 0     | 0          |
| GO:0009089 BP 05 lysine biosynthetic process via diaminopimelate                          | 0               | 0     | 0.1   | 0     | 0          |
| GO:0009435 BP 08 NAD biosynthetic process                                                 | 0               | 0     | 0.1   | 0     | 0          |
| GO:0009435 BP 08 NAD biosynthetic process                                                 | 0               | 0     | 0.1   | 0     | 0          |
| GO:0032508 BP 07 DNA duplex unwinding                                                     | 0               | 0     | 0     | 0     | 0          |
| GO:0009229 BP 05 thiamine diphosphate biosynthetic process                                | 0.09            | 0     | 0.11  | 0     | 0          |
| GO:0009396 BP 06 folic acid containing compound biosynthetic process                      | 0               | 0.09  | 0     | 0     | 0          |
| GO:0009287 BP 03 organ morphogenesis                                                      | 0               | 0     | 0     | 0     | 0          |
| GO:0018108 BP 07 peptidyl tyrosine phosphorylation                                        | 0               | 0     | 0     | 0.13  | 0.09       |
| GO:0006413 BP 03 translational initiation                                                 | 0               | 0     | 0     | 0.17  | 0          |
| GO:000655 BP 04 drug transmembrane transport                                              | 0.09            | 0     | 0     | 0     | 0          |
| GO:0006184 BP 07 GTP catabolic process                                                    | 0.1             | 0     | 0     | 0     | 0          |
| GO:0030261 BP 03 chromosome condensation                                                  | 0.09            | 0     | 0     | 0     | 0.1        |
| GO:0031123 BP 06 RNA 3 end processing                                                     | 0.1             | 0     | 0.14  | 0     | 0          |
| GO:0032535 BP 03 regulation of cellular component size                                    | 0               | -0.14 | 0.13  | 0     | -0.15      |
| GO:0007389 BP 03 pattern specification process                                            | 0               | -0.16 | 0.14  | 0     | -0.14-0.16 |
| GO:0071805 BP 04 potassium ion transmembrane transport                                    | 0               | -0.14 | 0     | 0     | 0          |
| GO:0000723 BP 03 telomere maintenance                                                     | 0               | -0.15 | 0     | 0     | 0          |
| GO:0045226 BP 05 extracellular polysaccharide biosynthetic process                        | 0               | -0.13 | 0     | 0     | 0          |
| GO:0046854 BP 06 phosphatidylinositol phosphorylation                                     | -0.12           | 0     | 0     | 0     | 0          |
| GO:0009103 BP 05 lipopolysaccharide biosynthetic process                                  | -0.12           | -0.12 | 0     | 0     | 0          |
| GO:0019321 BP 05 pentose metabolic process                                                | 0               | 0.12  | -0.16 | 0     | 0.08       |
| GO:0035821 BP 02 modification of morphology or physiology of other organism               | 0               | -0.14 | -0.15 | 0     | 0          |
| GO:0030416 BP 04 response to light stimulus                                               | -0.16           | 0     | 0     | 0     | 0          |
| GO:0044070 BP 06 regulation of anion transport                                            | 0               | -0.18 | -0.19 | 0     | 0.11       |
| GO:0006821 BP 06 chloride transport                                                       | 0               | -0.18 | -0.18 | 0     | 0.11       |
| GO:0009408 BP 03 response to heat                                                         | -0.09-0.14      | 0     | 0     | 0.16  | 0          |
| GO:0006541 BP 06 glutamine metabolic process                                              | -0.11-0.16      | 0     | 0     | 0.16  | 0          |
| GO:0015748 BP 03 organophosphate ester transport                                          | -0.11-0.16      | 0     | -0.09 | 0.18  | 0          |
| GO:0010498 BP 05 proteasomal protein catabolic process                                    | 0               | -0.1  | -0.12 | -0.15 | 0.18       |
| GO:0006098 BP 05 pentose phosphate shunt                                                  | 0               | 0.16  | -0.12 | -0.16 | 0.2        |
| GO:0045597 BP 05 positive regulation of cell differentiation                              | 0.11            | 0.13  | 0     | 0     | 0          |
| GO:0006777 BP 04 Mo molybdopter cofactor biosynthetic process                             | 0.11            | 0.11  | 0     | 0     | 0          |
| GO:0006836 BP 03 neurotransmitter transport                                               | 0.1             | 0.14  | 0     | 0     | 0          |
| GO:0000724 BP 05 double strand break repair via homologous recombination                  | 0.16            | 0.11  | 0     | 0     | 0          |
| GO:0015853 BP 04 peptide transport                                                        | 0               | 0     | 0     | 0     | 0          |
| GO:0007059 BP 03 chromosome segregation                                                   | 0.11            | 0.13  | 0     | 0     | 0.12       |
| GO:0034219 BP 04 carbohydrate transmembrane transport                                     | 0.15            | 0.12  | 0     | 0     | 0.13       |
| GO:0008817 BP 06 phosphate ion transport                                                  | 0.1             | 0     | 0     | 0     | 0.12       |
| GO:0008917 BP 05 barrier septum assembly                                                  | 0.13            | 0     | 0     | 0     | 0.09       |
| GO:0051302 BP 04 regulation of cell division                                              | 0.13            | 0     | 0     | 0     | 0          |
| GO:0009401 BP 04 phosphoenolpyruvate dependent sugar phosphotransferase system            | 0.16            | 0.12  | 0     | 0     | 0.17       |
| GO:0009401 BP 04 phosphoenolpyruvate dependent sugar phosphotransferase system            | 0.11            | 0.09  | 0     | 0     | 0.12       |
| GO:0009401 BP 04 phosphoenolpyruvate dependent sugar phosphotransferase system            | 0.17            | 0.1   | 0     | 0     | 0.17       |
| GO:0042777 BP 08 plasma membrane ATP synthase coupled protein transport                   | 0.17            | 0.1   | 0     | 0     | 0.2        |
| GO:0015718 BP 05 monocarboxylic acid transport                                            | 0.17            | 0.1   | 0     | 0     | 0.15       |
| GO:0007049 BP 03 cell cycle                                                               | 0.15            | 0.14  | 0     | 0     | 0.11       |
| GO:0009092 BP 04 cell morphogenesis                                                       | 0.12            | 0.16  | 0     | 0     | 0.11       |
| GO:0006289 BP 04 nucleotide excision repair                                               | 0.12            | 0.16  | 0     | 0     | 0.11       |
| GO:0032784 BP 07 regulation of DNA templated transcription elongation                     | 0.13            | 0.16  | 0     | 0     | 0.14       |
| GO:0019835 BP 02 cytolytic                                                                | 0.1             | 0     | 0.11  | 0     | 0.16       |
| GO:0006835 BP 05 dicarboxylic acid transport                                              | 0.12            | 0.14  | 0.13  | 0     | 0.11       |
| GO:0001522 BP 06 pseudouridine synthesis                                                  | 0               | 0     | 0     | 0     | 0.16       |
| GO:0000413 BP 08 protein peptidyl prolyl isomerization                                    | 0               | 0     | 0.11  | 0     | 0.12       |
| GO:0043624 BP 06 cellular protein complex disassembly                                     | 0               | 0.1   | 0.14  | 0     | 0.12       |
| GO:0006457 BP 05 protein folding                                                          | 0.1             | 0     | 0.15  | 0     | 0.16       |
| GO:0007056 BP 07 threonylcarbamoyladenosine biosynthetic process                          | 0               | 0     | 0.13  | 0     | -0.13      |
| GO:0008135 BP 04 regulation of cellular response to stress                                | 0               | 0     | 0.1   | 0     | -0.12      |
| GO:0016226 BP 03 iron sulfur cluster assembly                                             | 0               | 0     | 0.09  | 0     | 0.09       |
| GO:0051205 BP 05 protein insertion into membrane                                          | 0               | 0     | 0.1   | 0     | 0.15       |
| GO:0042254 BP 04 ribosome biogenesis                                                      | 0               | 0     | 0.12  | 0     | 0.12       |
| GO:0009432 BP 04 SOS response                                                             | 0               | 0     | 0.15  | 0     | 0.11       |
| GO:0009086 BP 06 methionine biosynthetic process                                          | 0               | 0     | 0.17  | 0     | 0.15       |
| GO:0007205 BP 06 protein kinase C activating G protein coupled receptor signaling pathway | 0.09            | 0     | 0     | 0     | 0.09       |
| GO:0006275 BP 06 regulation of DNA replication                                            | 0               | 0     | 0.12  | 0     | 0.09       |
| GO:0065002 BP 04 intracellular protein transmembrane transport                            | 0               | 0     | 0     | 0     | 0.11       |
| GO:0015671 BP 04 oxygen transport                                                         | 0               | 0     | 0     | 0     | 0.1        |
| GO:0035335 BP 07 peptidyl tyrosine dephosphorylation                                      | 0               | 0     | 0     | 0     | 0.09       |

Table S8. Related to Figure 4. FDR values for all significant GO category associations

|                                                                                       | CA(C) | CA(H) | LPS    | BF   | SA   |      |
|---------------------------------------------------------------------------------------|-------|-------|--------|------|------|------|
| GO:0007067 BP 04 mitotic nuclear division                                             | 0.13  | 0     | 0      | 0    | 0    | 0    |
| GO:0002697 BP 04 regulation of immune effector process                                | 0.19  | 0     | 0      | 0    | 0.15 | 0    |
| GO:0043408 BP 06 regulation of MAPK cascade                                           | 0.16  | 0     | 0      | 0    | 0.07 | 0    |
| GO:0016999 BP 04 antibiotic metabolic process                                         | 0.17  | 0     | 0      | 0    | 0.07 | 0    |
| GO:0061025 BP 04 membrane fusion                                                      | 0.16  | 0     | 0      | 0    | 0.06 | 0    |
| GO:0042176 BP 05 regulation of catabolic process                                      | 0.09  | 0.16  | 0      | 0    | 0.11 | 0    |
| GO:0009060 BP 05 aerobic respiration                                                  | 0.13  | 0     | 0.16   | 0    | 0.12 | 0    |
| GO:0001172 BP 07 transcription RNA templated                                          | 0.12  | 0     | 0.18   | 0    | 0.09 | 0    |
| GO:0006633 BP 05 fatty acid biosynthetic process                                      | 0     | 0     | 0      | 0    | 0.15 | 0    |
| GO:0002685 BP 06 RNA dependent DNA replication                                        | 0.12  | 0     | 0      | 0    | 0.15 | 0    |
| GO:0007169 BP 06 transmembrane receptor protein tyrosine kinase signaling pathway     | 0     | 0     | 0      | 0    | 0.15 | 0    |
| GO:0006898 BP 06 receptor mediated endocytosis                                        | 0     | 0     | 0      | 0    | 0.13 | 0    |
| GO:0009226 BP 05 nucleotide sugar biosynthetic process                                | 0     | 0     | 0      | 0    | 0.18 | 0    |
| GO:0006278 BP 06 RNA dependent DNA replication                                        | 0     | 0     | 0      | 0    | 0.15 | 0    |
| GO:0030243 BP 07 cellulose metabolic process                                          | 0     | 0     | 0      | 0    | 0.18 | 0    |
| GO:0006730 BP 03 one carbon metabolic process                                         | 0     | 0     | 0      | 0    | 0.19 | 0    |
| GO:0032956 BP 05 regulation of actin cytoskeleton organization                        | 0     | 0     | 0      | 0    | 0.06 | 0    |
| GO:0008284 BP 05 positive regulation of cell proliferation                            | 0     | 0     | 0      | 0    | 0.12 | 0    |
| GO:0030334 BP 05 regulation of cell migration                                         | 0     | 0     | 0      | 0    | 0.07 | 0    |
| GO:0048598 BP 03 embryonic morphogenesis                                              | 0.1   | 0     | 0      | 0    | 0.06 | 0    |
| GO:0016477 BP 03 cell migration                                                       | 0.09  | 0     | 0.16   | 0    | 0.06 | 0    |
| GO:0045731 BP 03 system development                                                   | 0.13  | 0     | 0.18   | 0    | 0.06 | 0    |
| GO:0071345 BP 05 cellular response to cytokine stimulus                               | 0.19  | 0     | 0.16   | 0    | 0.03 | 0    |
| GO:0010927 BP 03 cellular component assembly involved in morphogenesis                | 0.12  | 0     | 0      | 0    | 0.06 | 0    |
| GO:0045944 BP 05 positive regulation of transcription from RNA polymerase II promoter | 0.09  | 0     | 0      | 0    | 0.06 | 0    |
| GO:0007229 BP 05 integrin mediated signaling pathway                                  | 0.13  | 0     | 0      | 0    | 0.15 | 0    |
| GO:0006269 BP 05 DNA replication synthesis of RNA primer                              | 0.19  | 0.09  | 0      | 0    | 0.06 | 0    |
| GO:0005991 BP 04 trehalose metabolic process                                          | 0.05  | 0     | 0      | 0    | 0    | 0    |
| GO:0007005 BP 03 mitochondrion organization                                           | 0.06  | 0     | 0      | 0    | 0    | 0    |
| GO:0043254 BP 04 regulation of protein complex assembly                               | 0.09  | 0     | 0      | 0    | 0    | 0    |
| GO:0051129 BP 04 negative regulation of cellular component organization               | 0.13  | 0     | 0      | 0    | 0    | 0    |
| GO:0032775 BP 05 DNA methylation on adenine                                           | 0.13  | 0     | 0      | 0    | 0    | 0    |
| GO:0001101 BP 03 response to acid chemical                                            | 0     | 0     | 0      | 0    | 0    | 0    |
| GO:0018298 BP 06 protein chromophore linkage                                          | 0.12  | 0     | 0      | 0    | 0    | 0    |
| GO:0007018 BP 04 microtubule based movement                                           | 0.15  | 0     | 0      | 0    | 0    | 0    |
| GO:0006338 BP 05 chromatin remodeling                                                 | 0.15  | 0     | 0      | 0    | 0    | 0    |
| GO:0006826 BP 07 ion ion transport                                                    | 0.16  | 0     | 0      | 0    | 0    | 0    |
| GO:0006099 BP 03 tricarboxylic acid cycle                                             | 0.2   | 0     | 0      | 0    | 0    | 0    |
| GO:0030488 BP 05 rRNA methylation                                                     | 0.08  | 0.19  | 0      | 0    | 0    | 0    |
| GO:0010243 BP 03 response to organonitrogen compound                                  | 0.11  | 0     | 0      | 0    | 0    | 0    |
| GO:0040007 BP 01 growth                                                               | 0.17  | 0.14  | 0      | 0    | 0    | 0    |
| GO:0006450 BP 03 regulation of translational fidelity                                 | 0.09  | 0.05  | 0.13   | 0    | 0    | 0    |
| GO:001817 BP 04 regulation of cytokine production                                     | 0.18  | 0.03  | 0.19   | 0    | 0    | 0    |
| GO:0045860 BP 07 positive regulation of protein kinase activity                       | 0.15  | 0.1   | 0.18   | 0    | 0    | 0    |
| GO:0051050 BP 04 positive regulation of cell growth                                   | 0.09  | 0.05  | 0      | 0    | 0    | 0    |
| GO:0006486 BP 03 protein glycosylation                                                | 0.08  | 0.14  | 0      | 0    | 0    | 0    |
| GO:0007264 BP 05 small GTPase mediated signal transduction                            | 0.09  | 0.12  | 0      | 0    | 0    | 0    |
| GO:0006744 BP 06 ubiquinone biosynthetic process                                      | 0.1   | 0.13  | 0      | 0    | 0    | 0    |
| GO:0034614 BP 05 cellular response to reactive oxygen species                         | 0.12  | 0     | 0      | 0    | 0    | 0    |
| GO:0009307 BP 05 DNA restriction modification system                                  | 0.15  | 0.12  | 0      | 0    | 0    | 0    |
| GO:0009148 BP 06 pyrimidine nucleoside triphosphate biosynthetic process              | 0.15  | 0.11  | 0      | 0    | 0    | 0    |
| GO:0045786 BP 05 negative regulation of cell cycle                                    | 0.17  | 0.13  | 0      | 0    | 0    | 0    |
| GO:0034765 BP 05 regulation of ion transmembrane transport                            | 0.16  | 0.07  | 0      | 0    | 0    | 0    |
| GO:0032101 BP 04 regulation of response to external stimulus                          | 0.09  | 0.09  | 0      | 0    | 0    | 0    |
| GO:0051223 BP 05 regulation of protein transport                                      | 0.15  | 0     | 0      | 0    | 0    | 0    |
| GO:0016485 BP 05 protein processing                                                   | 0.1   | 0.09  | 0.19   | 0    | 0    | 0    |
| GO:0007015 BP 05 actin filament organization                                          | 0.09  | 0.05  | 0.04   | 0    | 0.04 | 0    |
| GO:0006546 BP 07 glycine catabolic process                                            | 0.04  | 0.05  | 0      | 0    | 0.07 | 0    |
| GO:0043068 BP 06 positive regulation of programmed cell death                         | 0.09  | 0.2   | 0      | 0    | 0.04 | 0    |
| GO:0031347 BP 05 regulation of defense response                                       | 0.09  | 0.18  | 0      | 0    | 0.04 | 0    |
| GO:0019030 BP 04 meiotical cell cycle                                                 | 0.15  | 0.12  | 0      | 0    | 0.04 | 0    |
| GO:0022412 BP 03 cellular process involved in reproduction in multicellular organism  | 0.15  | 0.06  | 0      | 0    | 0.03 | 0    |
| GO:0016458 BP 03 gene silencing                                                       | 0.16  | 0.06  | 0      | 0    | 0.03 | 0    |
| GO:0008285 BP 05 negative regulation of cell proliferation                            | 0.09  | 0.06  | 0      | 0    | 0.03 | 0    |
| GO:004183 BP 04 Golgi vesicle transport                                               | 0.13  | 0.15  | 0      | 0    | 0.07 | 0    |
| GO:0051260 BP 07 protein homodimerization                                             | 0.1   | 0.06  | 0      | 0    | 0.06 | 0    |
| GO:0007275 BP 03 multicellular organismal development                                 | 0.09  | 0.1   | 0      | 0    | 0.06 | 0    |
| GO:0008283 BP 02 cell proliferation                                                   | 0.16  | 0.08  | 0      | 0    | 0.05 | 0    |
| GO:0006096 BP 03 glycolytic process                                                   | 0.09  | 0.18  | 0      | 0    | 0.16 | 0    |
| GO:0016567 BP 08 protein ubiquitination                                               | 0.12  | 0.06  | 0      | 0    | 0.12 | 0    |
| GO:0055072 BP 09 iron ion homeostasis                                                 | 0.09  | 0.03  | 0      | 0    | 0.18 | 0    |
| GO:0046916 BP 08 cellular transition metal ion homeostasis                            | 0.09  | 0.04  | 0      | 0    | 0.17 | 0    |
| GO:1902533 BP 06 positive regulation of intracellular signal transduction             | 0.17  | 0.03  | 0      | 0    | 0.07 | 0    |
| GO:0008202 BP 04 steroid metabolic process                                            | 0.15  | 0.06  | 0      | 0    | 0.05 | 0    |
| GO:1903530 BP 05 regulation of secretion by cell                                      | 0.09  | 0.03  | 0      | 0    | 0.11 | 0    |
| GO:0044247 BP 05 cellular polysaccharide catabolic process                            | 0.09  | 0.03  | 0      | 0    | 0.16 | 0    |
| GO:0009251 BP 06 glucan catabolic process                                             | 0.09  | 0.03  | 0      | 0    | 0.09 | 0    |
| GO:0006913 BP 06 nucleocytoplasmic transport                                          | 0.09  | 0.09  | 0      | 0    | 0.09 | 0    |
| GO:0050658 BP 04 RNA transport                                                        | 0.09  | 0.15  | 0      | 0    | 0.06 | 0    |
| GO:0051240 BP 04 positive regulation of multicellular organismal process              | 0.15  | 0.16  | 0      | 0    | 0.09 | 0    |
| GO:0006418 BP 06 rRNA aminoacylation for protein translation                          | 0.15  | 0.13  | 0      | 0    | 0.04 | 0    |
| GO:0009898 BP 03 tissue development                                                   | 0.14  | 0     | 0      | 0    | 0.04 | 0    |
| GO:0006954 BP 04 inflammatory response                                                | 0     | 0.09  | 0.13   | 0    | 0.06 | 0    |
| GO:0000226 BP 04 microtubule cytoskeleton organization                                | 0.17  | 0.1   | 0.13   | 0    | 0.03 | 0    |
| GO:0042537 BP 04 benzene containing compound metabolic process                        | 0.09  | 0.03  | 0.16   | 0    | 0.14 | 0.2  |
| GO:0006511 BP 07 ubiquitin dependent protein catabolic process                        | 0.09  | 0.09  | 0.12   | 0    | 0.04 | 0.2  |
| GO:0043900 BP 03 regulation of multi organism process                                 | 0.09  | 0.03  | 0.19   | 0    | 0.18 | 0.1  |
| GO:0051235 BP 02 maintenance of location                                              | 0.17  | 0.03  | 0      | 0    | 0.06 | 0    |
| GO:0009292 BP 03 genetic transfer                                                     | 0     | 0     | 0.15   | 0.08 | 0.13 | 0    |
| GO:0032776 BP 05 DNA methylation on cytosine                                          | 0.09  | 0.06  | 0      | 0.16 | 0.01 | 0    |
| GO:0030036 BP 04 actin cytoskeleton organization                                      | 0.09  | 0.19  | 0      | 0    | 0.04 | 0    |
| GO:0006915 BP 05 apoptotic process                                                    | 0.09  | 0.09  | 0.18   | 0    | 0.04 | 0    |
| GO:0000705 BP 04 cell cycle checkpoint                                                | 0.09  | 0.18  | 0      | 0    | 0.05 | 0    |
| GO:0016573 BP 04 histone acetylation                                                  | 0.09  | 0.19  | 0      | 0    | 0.05 | 0.12 |
| GO:0007267 BP 03 cell cell signaling                                                  | 0.11  | 0.06  | 0.13   | 0    | 0.03 | 0    |
| GO:0006266 BP 05 DNA ligation                                                         | 0.15  | 0.13  | 0.13   | 0.14 | 0.06 | 0    |
| GO:0017004 BP 07 cytochrome complex assembly                                          | 0.19  | 0     | 0      | 0    | 0    | 0    |
| GO:0000737 BP 06 DNA catabolic process endonucleolytic                                | 0.19  | 0     | 0      | 0    | 0    | 0    |
| GO:0042157 BP 04 lipoprotein metabolic process                                        | 0.17  | 0     | 0      | 0    | 0    | 0    |
| GO:0071555 BP 03 cell wall organization                                               | 0.15  | 0     | 0      | 0    | 0    | 0    |
| GO:0038032 BP 07 termination of G protein coupled receptor signaling pathway          | 0.15  | 0     | 0      | 0    | 0    | 0    |
| GO:0006801 BP 04 supravital metabolic process                                         | 0.09  | 0     | 0.16   | 0    | 0    | 0    |
| GO:0051701 BP 03 interaction with host                                                | 0     | 0     | 0.15   | 0    | 0    | 0    |
| GO:0016032 BP 03 viral process                                                        | 0     | 0     | 0.15   | 0    | 0    | 0    |
| GO:0046677 BP 04 response to antibiotic                                               | 0     | 0     | 0.13   | 0    | 0    | 0    |
| GO:0045454 BP 04 cell redox homeostasis                                               | 0     | 0     | 0.13   | 0    | 0    | 0    |
| GO:0015074 BP 05 DNA integration                                                      | 0     | 0     | 0.18   | 0    | 0    | 0    |
| GO:0006869 BP 03 lipid transport                                                      | 0     | 0     | 0.19   | 0    | 0    | 0    |
| GO:0006662 BP 04 glycerol ether metabolic process                                     | 0     | 0     | 0.2    | 0    | 0    | 0    |
| GO:0006352 BP 06 DNA templated transcription initiation                               | 0     | 0     | 0.15   | 0    | 0.18 | 0    |
| GO:0040008 BP 03 regulation of growth                                                 | 0.15  | 0.06  | 0      | 0    | 0    | 0    |
| GO:0006563 BP 06 L serine metabolic process                                           | 0.16  | 0.18  | 0      | 0    | 0.15 | 0    |
| GO:0016055 BP 05 Wnt signaling pathway                                                | 0     | 0.15  | 0      | 0    | 0    | 0    |
| GO:0045087 BP 03 innate immune process                                                | 0     | 0     | 0      | 0    | 0    | 0    |
| GO:0006402 BP 06 mRNA catabolic process                                               | 0     | 0.2   | 0.1    | 0    | 0    | 0    |
| GO:0019184 BP 06 nonribosomal peptide biosynthetic process                            | 0.15  | 0     | 0      | 0    | 0    | 0    |
| GO:0006744 BP 06 regulation of mitotic cell cycle phase transition                    | 0     | 0.2   | 0      | 0    | 0.06 | 0    |
| GO:0050776 BP 05 positive regulation of immune response                               | 0     | 0     | 0.14   | 0    | 0.06 | 0    |
| GO:0006094 BP 07 gluconeogenesis                                                      | 0.18  | 0     | 0      | 0    | 0.06 | 0    |
| GO:0006414 BP 05 translational elongation                                             | 0     | 0.13  | 0.19   | 0    | 0    | 0    |
| GO:0006261 BP 06 DNA dependent DNA replication                                        | 0     | 0     | 0.13   | 0.19 | 0    | 0    |
| GO:0009423 BP 07 chromosome biosynthetic process                                      | 0     | 0     | 0.16   | 0    | 0    | 0    |
| GO:0009089 BP 05 lysine biosynthetic process via diaminopimelate                      | 0     | 0     | 0.15   | 0    | 0    | 0    |
| GO:0015979 BP 03 photosynthesis                                                       | 0     | 0     | 0.17   | 0    | 0    | 0    |
| GO:0009435 BP 08 NAD biosynthetic process                                             | 0     | 0     | 0.18   | 0    | 0    | 0    |
| GO:0032508 BP 07 DNA duplex unwinding                                                 | 0     | 0     | 0.17   | 0    | 0    | 0    |
| GO:0009229 BP 05 thiamine diphosphate biosynthetic process                            | 0.19  | 0     | 0.15   | 0    | 0    | 0    |
| GO:0009396 BP 06 folic acid containing compound biosynthetic process                  | 0     | 0.19  | 0.16   | 0    | 0    | 0    |
| GO:0009264 BP 05 self proteolysis                                                     | 0     | 0     | 0      | 0    | 0    | 0.2  |
| GO:0009887 BP 03 organ morphogenesis                                                  | 0     | 0     | 0      | 0    | 0    | 0    |
| GO:0018108 BP 07 peptidyl tyrosine phosphorylation                                    | 0     | 0     | 0      | 0.17 | 0.19 | 0    |
| GO:0006413 BP 03 translational initiation                                             | 0     | 0     | 0      | 0.04 | 0    | 0    |
| GO:0006855 BP 04 drug transmembrane transport                                         | 0.19  | 0     | 0      | 0    | 0    | 0    |
| GO:0006184 BP 07 GTP catabolic process                                                | 0.1   | 0     | 0      | 0    | 0    | 0    |
| GO:0030261 BP 03 chromosome condensation                                              | 0.18  | 0     | 0      | 0    | 0.12 | 0    |
| GO:0031123 BP 06 RNA 3 end processing                                                 | 0.17  | 0     | 0.19   | 0    | 0    | 0    |
| GO:0032535 BP 03 regulation of cellular component size                                | 0     | 0.14  | 0.14   | 0    | 0    | 0.1  |
| GO:0007389 BP 03 pattern specification process                                        | 0     | 0.06  | 0.13   | 0    | 0    | 0.12 |
| GO:0071805 BP 04 potassium ion transmembrane transport                                | 0     | 0     | 0.13   | 0    | 0    | 0    |
| GO:0000723 BP 03 telomere maintenance                                                 | 0     | 0.13  | 0      | 0    | 0    | 0    |
| GO:0045226 BP 05 extracellular polysaccharide biosynthetic process                    | 0     | 0.19  | 0      | 0    | 0    | 0    |
| GO:0046854 BP 06 phosphatidylinositol phosphorylation                                 | 0.09  | 0.2   | 0      | 0    | 0    | 0    |
| GO:0009103 BP 05 lipopolysaccharide biosynthetic process                              | 0.09  | 0.2   | 0      | 0    | 0    | 0    |
| GO:0019321 BP 05 pentose metabolic process                                            | 0     | 0.19  | 0.13   | 0    | 0.2  | 0    |
| GO:0035821 BP 02 modification of morphology or physiology of other organism           | 0     | 0     | 0.13   | 0.14 | 0    | 0    |
| GO:0009416 BP 04 response to light stimulus                                           | 0.04  | 0     | 0.05   | 0.03 | 0.09 | 0.17 |
| GO:0044070 BP 06 regulation of anion transport                                        | 0     | 0     | 0.05   | 0.03 | 0.09 | 0.17 |
| GO:0006821 BP 06 chloride transport                                                   | 0.17  | 0.06  | 0      | 0    | 0.07 | 0    |
| GO:0006541 BP 06 glutamine metabolic process                                          | 0.13  | 0.03  | 0      | 0    | 0.19 | 0    |
| GO:0015746 BP 03 organophosphate ester transfer                                       | 0.12  | 0.03  | 0      | 0.2  | 0.03 | 0    |
| GO:0010498 BP 05 proteasomal protein catabolic process                                | 0     | 0.14  | 0.2    | 0.15 | 0.03 | 0    |
| GO:0006098 BP 05 pentose phosphate shunt                                              | 0     | 0.04  | 0.2    | 0.14 | 0.02 | 0    |
| GO:0045597 BP 05 positive regulation of cell differentiation                          | 0.09  | 0.08  | 0      | 0    | 0    | 0    |
| GO:0006777 BP 04 Mo molybdopter cofactor biosynthetic process                         | 0.12  | 0.13  | 0      | 0    | 0    | 0    |
| GO:0006836 BP 03 neurotransmitter transport                                           | 0.15  | 0.06  | 0      | 0    | 0    | 0    |
| GO:0000724 BP 05 double strand break repair via homologous recombination              | 0.04  | 0.1   | 0      | 0    | 0.05 | 0    |
| GO:0015633 BP 04 peptide transport                                                    | 0.15  | 0.03  | 0      | 0    | 0.05 | 0    |
| GO:0007059 BP 03 chromosome segregation                                               | 0.12  | 0.07  | 0      | 0    | 0.04 | 0    |
| GO:0034219 BP 04 carbohydrate transmembrane transport                                 | 0.05  | 0.09  | 0      | 0    | 0.04 | 0    |
| GO:0006817 BP 06 phosphate ion transport                                              | 0.16  | 0     | 0      | 0    | 0.06 | 0    |
| GO:0009317 BP 05 barrier septum assembly                                              | 0.09  | 0     | 0      | 0    | 0.15 | 0    |
| GO:0051302 BP 04 regulation of cell division                                          | 0     | 0.09  | 0      | 0    | 0    | 0    |
| GO:0009401 BP 04 phosphoenolpyruvate dependent sugar phosphotransferase system        | 0.04  | 0.09  | 0      | 0    | 0.03 | 0.09 |
| GO:0051301 BP 03 cell division                                                        | 0.12  | 0.18  | 0      | 0    | 0.06 | 0    |
| GO:0042777 BP 08 plasma membrane ATP synthesis coupled proton transport               | 0.04  | 0.14  | 0      | 0.16 | 0.08 | 0    |
| GO:0015718 BP 05 monocarboxylic acid transport                                        | 0.04  | 0.14  | 0      | 0.04 | 0.18 | 0    |
| GO:0007049 BP 03 cell cycle                                                           | 0.05  | 0.05  | 0.08   | 0    | 0.03 | 0    |
| GO:0009002 BP 04 cell morphogenesis                                                   | 0.09  | 0.03  | 0.15   | 0    | 0.07 | 0    |
| GO:0006289 BP 04 nucleotide excision repair                                           | 0     | 0     | 0.12   | 0    | 0.03 | 0    |
| GO:0032784 BP 07 regulation of DNA templated transcription elongation                 | 0.09  | 0.03  | 0.07   | 0    | 0.14 | 0    |
| GO:0019835 BP 02 cytokinesis                                                          | 0.15  | 0.19  | 0      | 0    | 0.03 | 0    |
| GO:0006835 BP 05 dicarboxylic acid transport                                          | 0.09  | 0.06  | 0.14   | 0    | 0.07 | 0    |
| GO:0001522 BP 06 pseudouridine synthesis                                              | 0     | 0     | 0.09   | 0    | 0.09 | 0.1  |
| GO:0000413 BP 08 protein peptidyl prolyl isomerization                                | 0     | 0     | 0      | 0    | 0.18 | 0    |
| GO:0043624 BP 06 cellular protein complex disassembly                                 | 0.14  | 0     | 0.08   | 0    | 0.06 | 0.12 |
| GO:0006457 BP 05 protein folding                                                      | 0.15  | 0     | 0.07</ |      |      |      |
