# Supplementary material
Source: PubMed Central journal article supplement (PMC5131922)

Figure S3

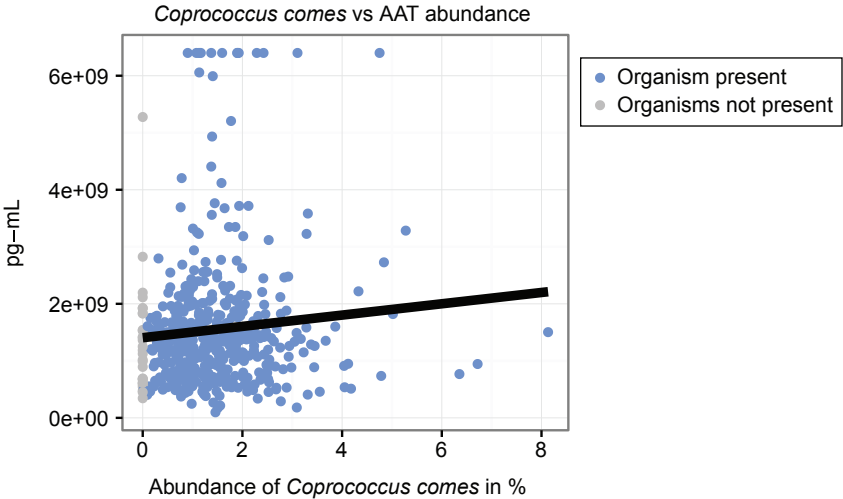

Supplement: NIHMS825283-supplement-3.pdf [file NIHMS825283-supplement-3.pdf]
